# Supplementary material for: One-step synthesis of indolizino[3,4,5-ab]isoindoles by manganese(i)-catalyzed C–H activation: structural studies and photophysical properties
Source: Royal Society of Chemistry journal article supplement (doi:10.1039/d1ob02246f), 2021-12-22

## Supporting Information

### One-Step Synthesis of Indolizino[3,4,5-*ab*]isoindoles by Manganese(I)-Catalyzed C–H Activation: Structural Studies and Photophysical Properties

Sara Cembellín,<sup>\*[a,b]</sup> Iván Maisuls,<sup>[c]</sup> Constantin G. Daniliuc,<sup>[a]</sup> Helena Osthues,<sup>[d]</sup> Nikos L.  
Doltsinis,<sup>[d]</sup> Cristian A. Strassert<sup>[c]</sup> and Frank Glorius<sup>[a]</sup>

<sup>[a]</sup> Organisch-Chemisches Institut, Westfälische Wilhelms-Universität Münster, Corrensstraße 40, 48149  
Münster, Germany.

<sup>[b]</sup> Organic Chemistry Department, Universidad Complutense de Madrid, 28040 Madrid, Spain.

<sup>[c]</sup> Institute for Inorganic and Analytical Chemistry, Center for Nanotechnology, Center for  
Soft Nanoscience, Westfälische Wilhelms-Universität Münster, Heisenbergstraße 11, 48149 Münster,  
Germany.

<sup>[d]</sup> Institut für Festkörperteorie, Westfälische Wilhelms-Universität Münster, Wilhelm-Klemm-Straße 10,  
48149 Münster, Germany.

[scembellin@ucm.es](mailto:scembellin@ucm.es)

# Supporting Information

## Table of Contents

|                                                              |     |
|--------------------------------------------------------------|-----|
| 1. General Information.....                                  | S3  |
| 2. Synthesis of Substrates.....                              | S4  |
| 3. Optimization of the Reaction Conditions.....              | S4  |
| 4. Procedure and Analytical Data of Compounds <b>3</b> ..... | S6  |
| 5. Mechanistic Studies.....                                  | S10 |
| 5.1. Stoichiometric Reaction.....                            | S10 |
| 5.2. Screening of Different Catalysts.....                   | S11 |
| 5.3. Screening of Different 1,3-Enynes .....                 | S12 |
| 6. X-Ray Diffractometric Analysis.....                       | S13 |
| 7. Photophysical Studies.....                                | S17 |
| 7.1. Photoluminescence Measurements at Room Temperature..... | S19 |
| 7.2. Photoluminescence Measurements at Low Temperature.....  | S21 |
| 8. Computational Study.....                                  | S23 |
| 8.1. Computational Details.....                              | S23 |
| 8.2. Calculated Absorption Spectra.....                      | S23 |
| 8.3. Optimized Geometries.....                               | S24 |
| 8.4. Kohn-Sham Orbitals.....                                 | S25 |
| 8.5. Single Excitations.....                                 | S28 |
| 9. References.....                                           | S30 |
| 10. NMR Spectra of Products.....                             | S32 |

## 1. General Information

Unless otherwise noted, all reactions were carried out under an atmosphere of argon in oven-dried glassware cooled down under vacuum. Reaction temperatures are reported as the temperature of the heat transfer medium surrounding the vessel unless otherwise stated.

The following solvents were dried by distillation over the drying agents indicated in parentheses: THF (Na/benzophenone), toluene (CaH<sub>2</sub>), Et<sub>2</sub>O (Na/benzophenone), CH<sub>2</sub>Cl<sub>2</sub> (CaH<sub>2</sub>). Additional anhydrous solvents ( $\leq 50$  ppm water) were purchased from Acros Organics, Sigma-Aldrich, or Carl Roth and stored over molecular sieves under an argon atmosphere.

Commercially available chemicals were obtained from Acros Organics, Aldrich Chemical Co., Alfa Aesar, ABCR, TCI Europe, Combi-Blocks and Fluorochem, and used as received unless otherwise stated.

Analytical thin layer chromatography (TLC) was performed on silica gel 60 F254 aluminum plates (Merck) and they were visualized by exposure to short wave ultraviolet light (254 nm, 366 nm) and/or by staining. For staining the TLC plates were dipped into a solution of KMnO<sub>4</sub> (1 g KMnO<sub>4</sub>, 6 g K<sub>2</sub>CO<sub>3</sub> and 0.1 g KOH in 100 mL H<sub>2</sub>O) and developed with a heat gun if necessary. Flash chromatography was performed on Merck silica gel (40-63 mesh) by standard techniques using appropriate mixtures of *n*-pentane and ethyl acetate with a positive argon overpressure.

<sup>1</sup>H- and <sup>13</sup>C-NMR spectra were recorded at room temperature on a Bruker AV 300 or AV 400, Varian 500 MHz INOVA or Varian Unity plus 600 in solvents as indicated. Chemical shifts ( $\delta$ ) for <sup>1</sup>H- and <sup>13</sup>C-NMR spectra are given in ppm relative to tetramethylsilane (TMS) using the residual solvent signals as references for <sup>1</sup>H and <sup>13</sup>C NMR spectra ((CD<sub>3</sub>)<sub>2</sub>CO:  $\delta_{\text{H}}$  = 2.05 ppm,  $\delta_{\text{C}}$  = 29.84, 206.26 ppm).<sup>[1]</sup> Chemical shifts are generally reported with two (<sup>1</sup>H) or one (all other nuclei) digits after the decimal point. NMR-data are reported as follows: chemical shift (multiplicity [s = singlet, d = doublet, t = triplet, q = quartet, quint = quintet, sept = septet, m = multiplet,

br = broad], coupling constants ( $J$ , Hz) and integration). All spectra were processed using the MestReNova program.

High resolution mass spectra (HRMS) were recorded on a Bruker Daltonics MicroTof or on a Thermo-Fisher Scientific Orbitrap LTQ XL spectrometer using electron spray ionization (ESI).

GC-MS spectra were recorded on an Agilent Technologies 7890A GC-system with an Agilent 5975C VL MSD or an Agilent 5975 inert Mass Selective Detector (EI) and an HP-5MS column (30 m, 0.32mm, film: 0.25  $\mu$ m). The major signals are quoted in  $m/z$  with the relative intensity in parentheses.

## 2. Synthesis of Substrates

2-Phenylpyridine (**1a**) is commercially available while compounds **1b-f** were prepared from 2-bromopyridine and the corresponding boronic acids as reported in the literature.<sup>[2]</sup> 2-(4-methoxyphenyl)pyridine (**1b**), 2-(4-chlorophenyl)pyridine (**1c**), 2-(4-bromophenyl)pyridine (**1d**), 2-(4-iodophenyl)pyridine (**1e**) and 2-(naphthalen-2-yl)pyridine (**1f**) are known compounds and their spectral data are in agreement with the literature values.<sup>[3]</sup> 1,3-Enyne **2** was prepared from isobutyryl chloride and bis(trimethylsilyl)-acetylene in two steps without need of purification according to a procedure described in the literature.<sup>[4]</sup> All the protocols were employed without any optimization of the reaction conditions.

## 3. Optimization of the Reaction Conditions

*General procedure for the optimization of the reaction conditions:*

In a 10 mL oven-dried Schlenk tube with a stirring bar, 2-phenylpyridine (**1a**, 0.1 mmol, 14.3  $\mu$ L), 4-methyl-1-(trimethylsilyl)pent-3-en-1-yn-3-yl trifluoromethanesulfonate (**2**, 0.15 mmol, 45.1 mg),  $\text{MnBr}(\text{CO})_5$  (10 mol%, 2.7 mg) and the base were added under air. Then, the reaction vessel was evacuated and filled with argon three times. Afterwards, the respective solvent (0.5 mL) was added under an argon

atmosphere. The tube was sealed and the mixture was stirred (1100r/min) at the appropriate temperature for indicated time. The reaction was allowed to cool to room temperature and the volatiles were removed. Yield was determined by <sup>1</sup>H-NMR analysis using 1,2-dibromomethane (7 μL, 0.1 mmol) as the internal standard.

**Table S1.** Optimization of reaction conditions.

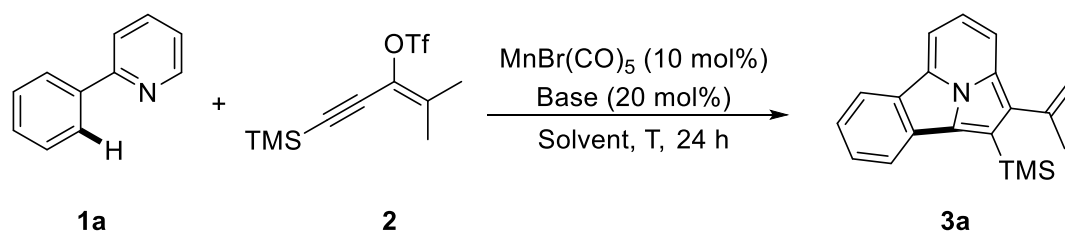

| Entry             | Solvent           | Base                    | Additive | T (°C)    | Conversion of 1a (%) | Yield of 3a (%) |
|-------------------|-------------------|-------------------------|----------|-----------|----------------------|-----------------|
| 1                 | Et <sub>2</sub> O | Cy <sub>2</sub> NH      | -        | 90        | 15                   | 13              |
| 2                 | 1,4-dioxane       | Cy <sub>2</sub> NH      | -        | 90        | 10                   | 10              |
| <b>3</b>          | <b>DCE</b>        | <b>Cy<sub>2</sub>NH</b> | -        | <b>90</b> | <b>17</b>            | <b>15</b>       |
| 4                 | DMF               | Cy <sub>2</sub> NH      | -        | 90        | 0                    | n.d.            |
| 5                 | toluene           | Cy <sub>2</sub> NH      | -        | 90        | 10                   | 10              |
| 6                 | DME               | Cy <sub>2</sub> NH      | -        | 90        | 5                    | 5               |
| 7                 | THF               | Cy <sub>2</sub> NH      | -        | 90        | 0                    | n.d.            |
| 8                 | MeCN              | Cy <sub>2</sub> NH      | -        | 90        | 0                    | n.d.            |
| 9                 | MeOH              | Cy <sub>2</sub> NH      | -        | 90        | 0                    | n.d.            |
| 10                | DMA               | Cy <sub>2</sub> NH      | -        | 90        | 0                    | n.d.            |
| 11                | DCM               | Cy <sub>2</sub> NH      | -        | 90        | 15                   | 15              |
| 12 <sup>[a]</sup> | DCE               | Cy <sub>2</sub> NH      | -        | rt        | 5                    | 5               |
| 13                | DCE               | Cy <sub>2</sub> NH      | -        | 135       | 20                   | 15              |
| 14                | DCE               | NaOAc                   | -        | 90        | 10                   | 10              |

|                   |     |                                |                                        |    |    |    |
|-------------------|-----|--------------------------------|----------------------------------------|----|----|----|
| 15                | DCE | K <sub>3</sub> PO <sub>4</sub> | -                                      | 90 | 10 | 10 |
| 16                | DCE | <sup>i</sup> PrNH <sub>2</sub> | -                                      | 90 | 15 | 10 |
| 17                | DCE | DBU                            | -                                      | 90 | 14 | 10 |
| 18                | DCE | DIPEA                          | -                                      | 90 | 10 | 10 |
| 19                | DCE | Cy <sub>2</sub> NH             | BPh <sub>3</sub>                       | 90 | 15 | 15 |
| 20                | DCE | Cy <sub>2</sub> NH             | H <sub>2</sub> O                       | 90 | 14 | 10 |
| 21                | DCE | Cy <sub>2</sub> NH             | HOAc                                   | 90 | 13 | 10 |
| 22                | DCE | Cy <sub>2</sub> NH             | PPh <sub>3</sub>                       | 90 | 10 | 8  |
| 23                | DCE | Cy <sub>2</sub> NH             | Cu(OAc) <sub>2</sub> ·H <sub>2</sub> O | 90 | 10 | 10 |
| 24                | DCE | Cy <sub>2</sub> NH             | CuBr <sub>2</sub>                      | 90 | 15 | 13 |
| 25                | DCE | Cy <sub>2</sub> NH             | DDQ                                    | 90 | 0  | 0  |
| 26 <sup>[b]</sup> | DCE | Cy <sub>2</sub> NH             | -                                      | 90 | 15 | 12 |
| 27 <sup>[c]</sup> | DCE | Cy <sub>2</sub> NH             | -                                      | 90 | 17 | 15 |
| 28 <sup>[d]</sup> | DCE | Cy <sub>2</sub> NH             | -                                      | 90 | 17 | 14 |
| 29 <sup>[e]</sup> | DCE | Cy <sub>2</sub> NH             | -                                      | rt | 0  | 0  |

<sup>[a]</sup> The time of the reaction was 48h. <sup>[b]</sup> 1 equiv. of **2** was used. <sup>[c]</sup> 2 equiv. of **2** were used. <sup>[d]</sup> MW was used instead of heating. <sup>[e]</sup> Irradiation with 450 nm LED spot of 40 W. DCE = 1,2-Dichloroethane. DMF = *N,N*-Dimethylformamide. DME = 1,2-Dimethoxyethane. THF = Tetrahydrofuran. DMA = *N,N*-Dimethylacetamide. DCM = Dichloromethane. DBU = 1,8-Diazabicyclo[5.4.0]undec-7-ene. DIPEA = *N,N*-Diisopropylethylamine.

#### 4. Procedure and Analytical Data of Compounds 3

*General procedure for the synthesis of indolizino[3,4,5-ab]isoindoles:*

In a 10 mL oven-dried Schlenk tube with a stirring bar, **1** (0.2 mmol), 4-methyl-1-(trimethylsilyl)pent-3-en-1-yn-3-yl trifluoromethanesulfonate (**2**, 0.3 mmol, 90.2 mg), MnBr(CO)<sub>5</sub> (10 mol%, 5.4 mg) and Cy<sub>2</sub>NH (20 mol%, 8μL) were added

under air. Then, the reaction vessel was evacuated and filled with argon three times. Afterwards, DCE (1 mL) was added under an argon atmosphere. The tube was sealed and the mixture was stirred (1100r/min) at 90 °C for 24h. The reaction was allowed to cool to room temperature, the volatiles were removed and the analytically pure product **3** was obtained by flash chromatography (silica gel; pentane/EtOAc).

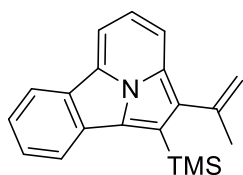

**2-(prop-1-en-2-yl)-1-(trimethylsilyl) indolizino [3,4,5-ab]**

**isoindole:** Following the general procedure, the reaction of 2-phenylpyridine (**1a**) (0.2 mmol, 28.6  $\mu$ L), 4-methyl-1-(trimethylsilyl)pent-3-en-1-yn-3-yl trifluoromethane sulfonate (**2**)

(0.15 mmol, 90.2 mg), MnBr(CO)<sub>5</sub> (10 mol%, 5.4 mg) and Cy<sub>2</sub>NH (20 mol%, 8  $\mu$ L) in DCE (1 mL) at 90 °C for 24h afforded the product **3a** (15%, 9.2 mg) as a yellow solid. **<sup>1</sup>H NMR (600 MHz, (CD<sub>3</sub>)<sub>2</sub>CO)**  $\delta$  8.60 (dt,  $J$  = 8.0, 0.9 Hz, 1H), 8.34 (d,  $J$  = 8.2 Hz, 1H), 8.31 (d,  $J$  = 7.4 Hz, 1H), 8.10 (d,  $J$  = 8.3 Hz, 1H), 7.81 – 7.70 (m, 2H), 7.54 (ddd,  $J$  = 8.0, 7.2, 0.9 Hz, 1H), 5.45 (dq,  $J$  = 2.9, 1.5 Hz, 1H), 5.15 (dd,  $J$  = 2.6, 0.9 Hz, 1H), 2.43 – 2.27 (m, 3H), 0.59 (s, 9H); **<sup>13</sup>C NMR (151 MHz, (CD<sub>3</sub>)<sub>2</sub>CO)**  $\delta$  141.1, 131.0, 130.0, 128.7, 128.0, 127.7, 127.2, 127.0, 126.2, 122.7, 122.5, 120.1, 119.2, 116.8, 114.5, 108.4, 26.1, 0.5; **HRMS**  $m/z$  (ESI) calcd. for C<sub>20</sub>H<sub>21</sub>NSi (M<sup>+</sup>): 303.1443, found 303.1441.

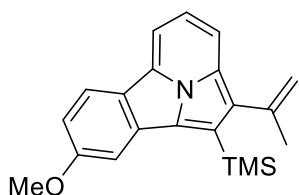

**8-methoxy-2-(prop-1-en-2-yl)-1-(trimethylsilyl)indolizino [3,4,5-ab]isoindole:**

Following the general procedure, the reaction of 2-(4-methoxyphenyl)pyridine (**1b**) (0.2 mmol, 37.0 mg), 4-methyl-1-(trimethylsilyl)pent-3-en-1-yn-3-yl

trifluoromethane sulfonate (**2**) (0.3 mmol, 90.2 mg), MnBr(CO)<sub>5</sub> (10 mol%, 5.4 mg) and Cy<sub>2</sub>NH (20 mol%, 8 $\mu$ L) in DCE (1 mL) at 90 °C for 24h afforded the product **3b** (13%, 9.0 mg) as a yellow solid. **<sup>1</sup>H NMR (300 MHz, (CD<sub>3</sub>)<sub>2</sub>CO)**  $\delta$  8.45 (d,  $J$  = 8.8 Hz, 1H), 8.14 (d,  $J$  = 7.3 Hz, 1H), 7.98 (d,  $J$  = 8.3 Hz, 1H), 7.74 – 7.63 (m, 2H), 7.15 (dd,  $J$  = 8.8, 2.3 Hz, 1H), 5.42 (dd,  $J$  = 2.6, 1.4 Hz, 1H), 5.12 (dd,  $J$  = 2.5, 0.8 Hz, 1H), 3.99 (s, 3H), 2.32 (bs, 3H), 0.58 (s, 9H); **<sup>13</sup>C NMR (126 MHz, (CD<sub>3</sub>)<sub>2</sub>CO)**  $\delta$  161.4, 142.2, 132.7, 131.9, 130.7, 128.5, 128.2, 124.8, 123.7, 123.0, 120.6, 117.9, 114.3, 113.1, 108.2,

103.6, 56.1, 27.2, 1.6; **HRMS** m/z (ESI) calcd. for C<sub>21</sub>H<sub>23</sub>NOSi (M<sup>+</sup>): 333.1549, found 333.1552.

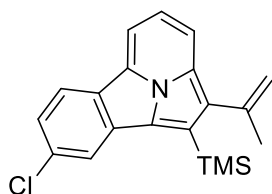

**8-chloro-2-(prop-1-en-2-yl)-1-(trimethylsilyl)indolizino[3,4,**

**5-ab]isoindole:** Following the general procedure, the reaction of 2-(4-chlorophenyl)pyridine (**1b**) (0.2 mmol, 38.0 mg), 4-methyl-1-(trimethylsilyl)pent-3-en-1-yn-3-yl trifluoromethane

sulfonate (**2**) (0.3 mmol, 90.2 mg), MnBr(CO)<sub>5</sub> (10 mol%, 5.4 mg) and Cy<sub>2</sub>NH (20 mol%, 8μL) in DCE (1 mL) at 90 °C for 24h afforded the product **3c** (20%, 13.4 mg) as a yellow solid. **<sup>1</sup>H NMR (300 MHz, (CD<sub>3</sub>)<sub>2</sub>CO)** δ 8.63 (d, *J* = 8.5 Hz, 1H), 8.38 (d, *J* = 7.3 Hz, 1H), 8.28 (d, *J* = 1.4 Hz, 1H), 8.15 (d, *J* = 8.3 Hz, 1H), 7.81 (dd, *J* = 8.3, 7.4 Hz, 1H), 7.55 (dd, *J* = 8.5, 1.9 Hz, 1H), 5.48 (dd, *J* = 2.5, 1.5 Hz, 1H), 5.17 (dd, *J* = 2.5, 0.9 Hz, 1H), 2.40 – 2.33 (m, 3H), 0.60 (s, 9H); **<sup>13</sup>C NMR (75 MHz, (CD<sub>3</sub>)<sub>2</sub>CO)** δ 140.3, 132.8, 131.5, 130.1, 127.1, 126.3, 126.1, 124.6, 123.7, 123.1, 122.0, 119.5, 118.8, 116.7, 114.3, 108.7, 25.5, 0.0; **HRMS** m/z (ESI) calcd. for C<sub>20</sub>H<sub>20</sub>ClNSi (M<sup>+</sup>): 337.1054, found 337.1050.

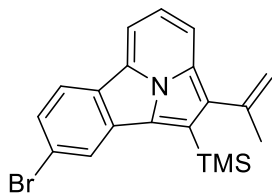

**8-bromo-2-(prop-1-en-2-yl)-1-(trimethylsilyl)indolizino[3,4,**

**5-ab]isoindole:** Following the general procedure, the reaction of 2-(4-bromophenyl)pyridine (**1d**) (0.2 mmol, 46.8 mg), 4-methyl-1-(trimethylsilyl)pent-3-en-1-yn-3-yl trifluoromethane

sulfonate (**2**) (0.3 mmol, 90.2 mg), MnBr(CO)<sub>5</sub> (10 mol%, 5.4 mg) and Cy<sub>2</sub>NH (20 mol%, 8μL) in DCE (1 mL) at 90 °C for 24h afforded the product **3d** (17%, 12.8 mg) as a yellow solid. **<sup>1</sup>H NMR (700 MHz, (CD<sub>3</sub>)<sub>2</sub>CO)** δ 8.58 (d, *J* = 8.6 Hz, 1H), 8.45 (dd, *J* = 8.3, 1.6 Hz, 1H), 8.40 (d, *J* = 7.2 Hz, 1H), 8.17 (d, *J* = 8.2 Hz, 1H), 7.82 (dd, *J* = 8.2, 7.3 Hz, 1H), 7.68 (dd, *J* = 8.4, 1.7 Hz, 1H), 5.48 (dd, *J* = 2.5, 1.4 Hz, 1H), 5.17 (dd, *J* = 2.4, 0.8 Hz, 1H), 2.37-2.35 (m, 3H), 0.61 (s, 9H); **<sup>13</sup>C NMR (176 MHz, (CD<sub>3</sub>)<sub>2</sub>CO)** δ 141.8, 133.0, 131.8, 131.5, 128.5, 128.0, 127.6, 126.2, 125.7, 125.5, 124.6, 123.4, 121.0, 118.2, 115.9, 110.3, 27.0, 1.5; **HRMS** m/z (ESI) calcd. for C<sub>20</sub>H<sub>20</sub>BrNSi (M<sup>+</sup>): 381.0548, found 381.0544.



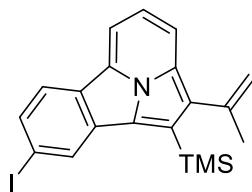

### 8-iodo-2-(prop-1-en-2-yl)-1-(trimethylsilyl)indolizino[3,4,5-a

**b]isoindole:** Following the general procedure, the reaction of

2-(4-iodophenyl)pyridine (**1e**) (0.2 mmol, 56.2 mg),

4-methyl-1-(trimethylsilyl)pent-3-en-1-yn-3-yl trifluoromethane

sulfonate (**2**) (0.3 mmol, 90.2 mg), MnBr(CO)<sub>5</sub> (10 mol%, 5.4 mg) and Cy<sub>2</sub>NH (20 mol%, 8μL) in DCE (1 mL) at 90 °C for 24h afforded the product **3e** (13%, 11.2 mg) as a yellow solid. **<sup>1</sup>H NMR (700 MHz, (CD<sub>3</sub>)<sub>2</sub>CO)** δ 8.70 (dd, *J* = 10,3, 1.2 Hz, 1H), 8.45 (d, *J* = 8.3 Hz, 1H), 8.40 (d, *J* = 7.2 Hz, 1H), 8.17 (d, *J* = 8.2 Hz, 1H), 7.87 (dd, *J* = 8.3, 1.5 Hz, 1H), 7.82 (d, *J* = 8.3 Hz, 1H), 5.48 (dd, *J* = 2.5, 1.4 Hz, 1H), 5.17 (dd, *J* = 2.4, 0.8 Hz, 1H), 2.36 (s, 3H), 0.60 (s, 9H); **<sup>13</sup>C NMR (176 MHz, (CD<sub>3</sub>)<sub>2</sub>CO)** δ 141.8, 137.9, 133.0, 132.2, 131.8, 131.3, 129.8, 128.4, 125.5, 124.4, 120.9, 119.5, 118.2, 116.1, 110.3, 94.3, 27.0, 1.5; **HRMS** *m/z* (ESI) calcd. for C<sub>20</sub>H<sub>20</sub>INSi (M<sup>+</sup>): 429.0410, found 429.0402.

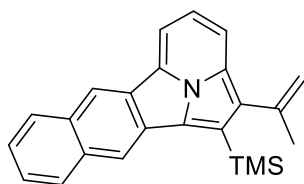

### 2-(prop-1-en-2-yl)-1-(trimethylsilyl)benzo[f]indolizino[3,

**4,5-ab]isoindole:** Following the general procedure, the

reaction of 2-(naphthalen-2-yl)pyridine (**1f**) (0.2 mmol, 41.1

mg), 4-methyl-1-(trimethylsilyl)pent-3-en-1-yn-3-yl trifluoro

methane sulfonate (**2**) (0.3 mmol, 90.2 mg), MnBr(CO)<sub>5</sub> (10 mol%, 5.4 mg) and Cy<sub>2</sub>NH (20 mol%, 8μL) in DCE (1 mL) at 90 °C for 24h afforded the product **3f** (11%, 7.6 mg) as a yellow solid. **<sup>1</sup>H NMR (300 MHz, (CD<sub>3</sub>)<sub>2</sub>CO)** δ 9.20 – 9.14 (m, 1H), 8.80 – 8.75 (m, 1H), 8.29 – 8.24 (m, 1H), 8.23 (d, *J* = 7.6 Hz, 2H), 8.03 (d, *J* = 8.4 Hz, 1H), 7.67 – 7.62 (m, 1H), 7.57 (d, *J* = 7.8 Hz, 2H), 5.46 (dd, *J* = 2.5, 1.5 Hz, 1H), 5.17 – 5.15 (m, 1H), 2.36 (s, 3H), 0.65 (s, 9H); **<sup>13</sup>C NMR (176 MHz, (CD<sub>3</sub>)<sub>2</sub>CO)** δ 142.1, 135.3, 134.4, 130.6, 129.6, 129.4, 127.3, 127.1, 126.8, 125.6, 125.4, 122.8, 120.5, 119.0, 118.4, 118.1, 117.7, 117.6, 116.2, 107.4, 26.99, 1.4; **HRMS** *m/z* (ESI) calcd. for C<sub>24</sub>H<sub>23</sub>NSi (M<sup>+</sup>): 353.1600, found 353.1611.

*Compounds detected but not characterized:*

The following compounds were detected by TLC and GC-MS but not fully characterized due to the low conversion of the substrates:

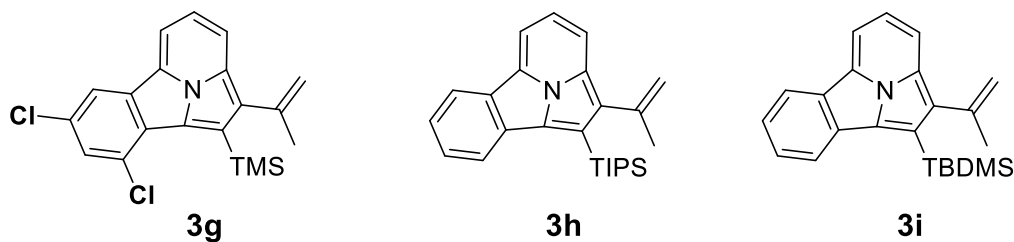

**Figure S1.** Indolizino[3,4,5-*ab*]isoindoles obtained through the described protocol but not characterized.

## 5. Mechanistic Studies

### 5.1. Stoichiometric Reaction

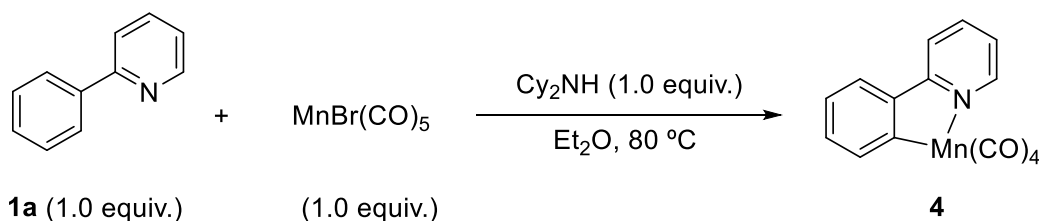

Compound **4** was prepared following a procedure previously reported in the literature.<sup>[2]</sup> In a 10 mL oven-dried Schlenk tube with a stirring bar,  $\text{MnBr}(\text{CO})_5$  (0.5 mmol, 137.5 mg) was added under a nitrogen atmosphere. Ethyl ether (2.0 ml), 2-phenylpyridine (**1a**, 0.5 mmol, 77.5 mg) and  $\text{Cy}_2\text{NH}$  (0.5 mmol, 90.5 mg) were then injected into the reaction tube. The reaction mixture was stirred at 80 °C for 6 h. The reaction was allowed to cool to room temperature, the mixture was diluted with ethyl acetate (20 ml) and filtered through a short pad of silica gel. The volatiles were removed and the analytically pure product **4** was obtained by flash chromatography (silica gel; pentane/EtOAc).

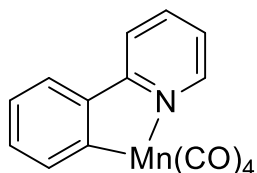

Following the procedure, the reaction afforded the product **4** (84%, 134.9 mg). **<sup>1</sup>H NMR (300 MHz, CDCl<sub>3</sub>)**  $\delta$  8.75 (d,  $J = 5.0$  Hz, 1H), 8.03 – 8.01 (m, 1H), 7.91 (d,  $J = 8.0$  Hz, 1H), 7.83 – 7.79 (m, 2H), 7.29 – 7.20 (m, 2H), 7.17 – 7.15 (m, 1H). Spectral

data is in accordance with the literature.<sup>[2]</sup>

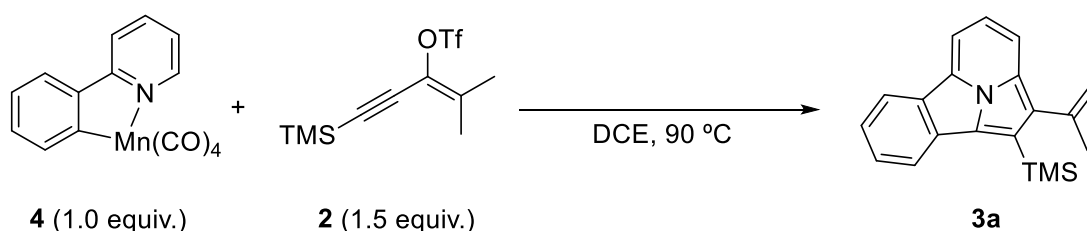

In a 10 mL oven-dried Schlenk tube with a stirring bar, compound **4** (0.42 mmol, 134 mg) and 4-methyl-1-(trimethylsilyl)pent-3-en-1-yn-3-yl trifluoromethanesulfonate (**2**, 0.63 mmol, 189 mg) were added under air. Then, the reaction vessel was evacuated and filled with argon three times. Afterwards, DCE (2.1 mL) was added under an argon atmosphere. The tube was sealed and the mixture was stirred (1100r/min) at 90 °C for 24h. The reaction was allowed to cool to room temperature, the volatiles were removed and the analytically pure product **3a** was obtained by flash chromatography (silica gel; pentane/EtOAc) in 20% yield (25.1 mg).

## 5.2. Screening of Different Catalysts

Following the general procedure for the synthesis of indolizino[3,4,5-*ab*]isoindoles, in a 10 mL oven-dried Schlenk tube with a stirring bar, 2-phenylpyridine (**1a**, 0.1 mmol, 14.3  $\mu\text{L}$ ), 4-methyl-1-(trimethylsilyl)pent-3-en-1-yn-3-yl trifluoromethanesulfonate (**2**, 0.15 mmol, 45.1 mg) and  $\text{Cy}_2\text{NH}$  (20 mol%, 4  $\mu\text{L}$ ) were added under air. Then, the reaction vessel was evacuated and filled with argon three times. Afterwards, the corresponding catalyst (10 mol%) and DCE (0.5 mL) were added under an argon atmosphere. The tube was sealed and the mixture was stirred (1100r/min) at 90 °C for 24h. The reaction was allowed to cool to room temperature and the volatiles were removed. Yield was determined by  $^1\text{H-NMR}$  analysis using 1,2-dibromomethane (7  $\mu\text{L}$ , 0.1 mmol) as the internal standard.

**Table S2.** Screening of different catalysts.

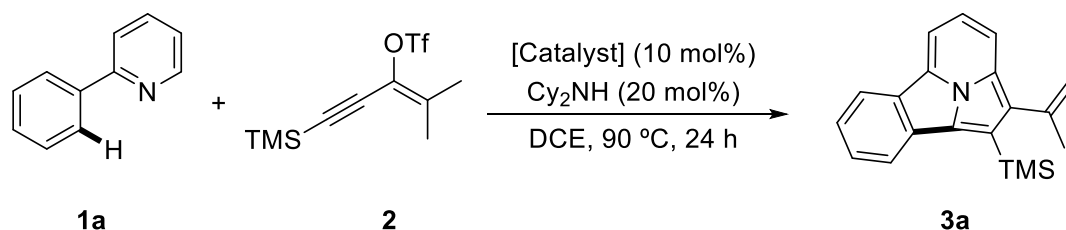

| Entry | Catalyst                                             | Yield of 3a (%) |
|-------|------------------------------------------------------|-----------------|
| 1     | Pd(OAc) <sub>2</sub>                                 | 0               |
| 2     | Cp*Co(CO)I <sub>2</sub>                              | 0               |
| 3     | [Cp*RhCl <sub>2</sub> ] <sub>2</sub>                 | 0               |
| 4     | [Ru( <i>p</i> -cymene)Cl <sub>2</sub> ] <sub>2</sub> | 0               |
| 5     | MnBr(CO) <sub>5</sub>                                | 15              |
| 6     | Mn <sub>2</sub> (CO) <sub>10</sub>                   | 15              |

### 5.3. Screening of Different 1,3-Enynes

Following the general procedure for the synthesis of indolizino[3,4,5-*ab*]isoindoles, in a 10 mL oven-dried Schlenk tube with a stirring bar, 2-phenylpyridine (**1a**, 0.1 mmol, 14.3  $\mu$ L), 1,3-enyne trifluoromethanesulfonate (**2**, 0.15 mmol), MnBr(CO)<sub>5</sub> (10 mol%, 2.7 mg) and Cy<sub>2</sub>NH (20 mol%, 4  $\mu$ L) were added under air. Then, the reaction vessel was evacuated and filled with argon three times. Afterwards, DCE (0.5 mL) was added under an argon atmosphere. The tube was sealed and the mixture was stirred (1100r/min) at 90 °C for 24h. The reaction was allowed to cool to room temperature and the volatiles were removed. Yield was determined by <sup>1</sup>H-NMR analysis using 1,2-dibromomethane (7  $\mu$ L, 0.1 mmol) as the internal standard.

**Table S3.** Screening of different 1,3-enynes.

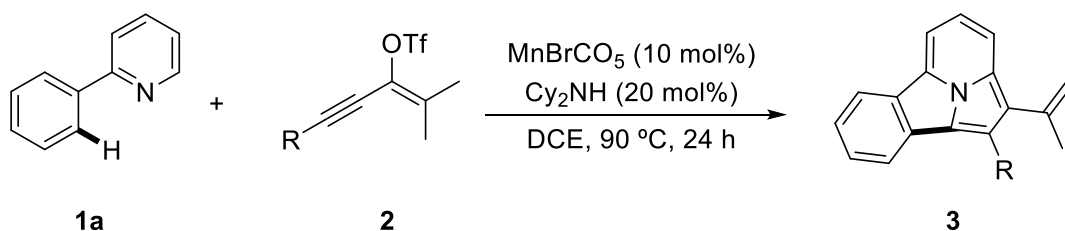

| Entry | R     | Yield of 3 (%) |
|-------|-------|----------------|
| 1     | Me    | 0              |
| 2     | Ph    | 0              |
| 3     | TIPS  | 12             |
| 4     | TBDMS | 9              |

## 6. X-Ray Diffractometric Analysis

**X-Ray diffraction:** Data sets for compound **3c** were collected with a Nonius Kappa CCD diffractometer. Programs used: data collection, COLLECT (R. W. W. Hooft, Bruker AXS, **2008**, Delft, The Netherlands); data reduction Denzo-SMN (Z. Otwinowski, W. Minor, *Methods Enzymol.* **1997**, 276, 307-326); absorption correction, Denzo (Z. Otwinowski, D. Borek, W. Majewski, W. Minor, *Acta Crystallogr.* **2003**, A59, 228-234); structure solution *SHELXT-2015* (Sheldrick, G. M. *Acta Cryst.*, **2015**, A71, 3-8); structure refinement *SHELXL-2015* (Sheldrick, G. M. *Acta Cryst.*, **2015**, C71 (1), 3-8) and graphics, *XP* (Version 5.1, Bruker AXS Inc., Madison, Wisconsin, USA, **1998**). *R*-values are given for observed reflections, and *wR*<sup>2</sup> values are given for all reflections.

**Exceptions and special features:** For compound **3c** the isopropenyl group was found disordered over two positions. Several restraints (SADI, SAME, ISOR and SIMU) were used in order to improve refinement stability.

**X-ray diffractometric crystal structure analysis of 3c:** A yellow plate-like specimen of C<sub>20</sub>H<sub>20</sub>ClNSi, approximate dimensions 0.020 mm x 0.080 mm x 0.100 mm, was used for the X-ray crystallographic analysis. The X-ray intensity data were measured.

The integration of the data using a triclinic unit cell yielded a total of 5254 reflections to a maximum  $\theta$  angle of 26.37° (0.80 Å resolution), of which 3548 were independent (average redundancy 1.481, completeness = 97.0%, *R*<sub>int</sub> = 4.29%, *R*<sub>sig</sub> = 4.37%) and 3020 (85.12%) were greater than 2 $\sigma$ (*F*<sup>2</sup>). The final cell constants of *a* = 8.4528(3) Å, *b*

= 10.0726(4) Å,  $c$  = 11.6966(6) Å,  $\alpha$  = 77.560(4)°,  $\beta$  = 75.781(3)°,  $\gamma$  = 68.597(2)°, volume = 890.01(7) Å<sup>3</sup>, are based upon the refinement of the XYZ-centroids of reflections above 20  $\sigma(I)$ . Data were corrected for absorption effects using the multi-scan method (SADABS). The calculated minimum and maximum transmission coefficients (based on crystal size) are 0.9720 and 0.9940.

The structure was solved and refined using the Bruker SHELXTL Software Package, using the space group P -1, with Z = 2 for the formula unit, C<sub>20</sub>H<sub>20</sub>CINSi. The final anisotropic full-matrix least-squares refinement on F<sup>2</sup> with 232 variables converged at R1 = 5.23%, for the observed data and wR2 = 13.53% for all data. The goodness-of-fit was 1.068. The largest peak in the final difference electron density synthesis was 0.266 e-/Å<sup>3</sup> and the largest hole was -0.278 e-/Å<sup>3</sup> with an RMS deviation of 0.056 e-/Å<sup>3</sup>. On the basis of the final model, the calculated density was 1.261 g/cm<sup>3</sup> and F(000), 356 e-. CCDC Nr.: 2032083.

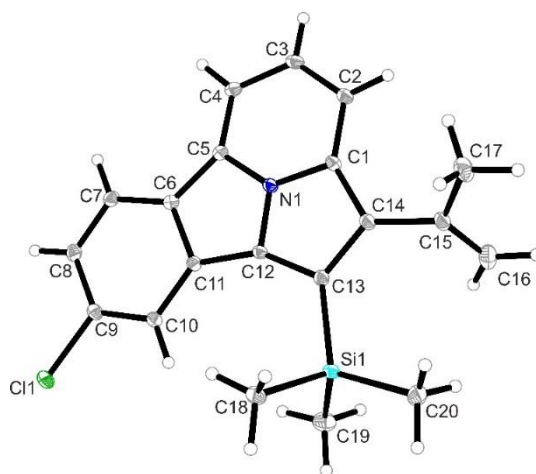

**Figure S2.** Molecular structure in the crystal of compound **3c** (CCDC 2032083, Thermal ellipsoids are shown with 15% probability).

**Table S4.** Bond lengths (Å) for compound **3c**.

|         |          |         |          |
|---------|----------|---------|----------|
| Cl1-C9  | 1.748(2) | N1-C12  | 1.366(3) |
| N1-C1   | 1.371(3) | N1-C5   | 1.371(3) |
| Si1-C20 | 1.861(3) | Si1-C18 | 1.862(3) |
| Si1-C19 | 1.864(3) | Si1-C13 | 1.877(2) |
| C1-C2   | 1.404(3) | C1-C14  | 1.425(3) |
| C2-C3   | 1.383(3) | C2-H2   | 0.95     |

|           |           |           |           |
|-----------|-----------|-----------|-----------|
| C3-C4     | 1.413(3)  | C3-H3     | 0.95      |
| C4-C5     | 1.372(3)  | C4-H4     | 0.95      |
| C5-C6     | 1.445(3)  | C6-C7     | 1.398(3)  |
| C6-C11    | 1.437(3)  | C7-C8     | 1.380(3)  |
| C7-H7     | 0.95      | C8-C9     | 1.401(4)  |
| C8-H8     | 0.95      | C9-C10    | 1.379(3)  |
| C10-C11   | 1.401(3)  | C10-H10   | 0.95      |
| C11-C12   | 1.445(3)  | C12-C13   | 1.423(3)  |
| C13-C14   | 1.419(3)  | C14-C15   | 1.483(3)  |
| C15-C16A  | 1.278(19) | C15-C16   | 1.295(10) |
| C15-C17   | 1.534(9)  | C15-C17A  | 1.553(17) |
| C16-H16A  | 0.95      | C16-H16B  | 0.95      |
| C17-H17A  | 0.98      | C17-H17B  | 0.98      |
| C17-H17C  | 0.98      | C16A-H16C | 0.95      |
| C16A-H16D | 0.95      | C17A-H17D | 0.98      |
| C17A-H17E | 0.98      | C17A-H17F | 0.98      |
| C18-H18A  | 0.98      | C18-H18B  | 0.98      |
| C18-H18C  | 0.98      | C19-H19A  | 0.98      |
| C19-H19B  | 0.98      | C19-H19C  | 0.98      |
| C20-H20A  | 0.98      | C20-H20B  | 0.98      |
| C20-H20C  | 0.98      |           |           |

**Table S5.** Bond angles ( $^{\circ}$ ) for compound **3c**.

|             |            |             |            |
|-------------|------------|-------------|------------|
| C12-N1-C1   | 113.56(19) | C12-N1-C5   | 116.59(18) |
| C1-N1-C5    | 129.78(19) | C20-Si1-C18 | 106.85(13) |
| C20-Si1-C19 | 109.89(14) | C18-Si1-C19 | 108.99(15) |
| C20-Si1-C13 | 107.19(11) | C18-Si1-C13 | 114.65(11) |
| C19-Si1-C13 | 109.18(13) | N1-C1-C2    | 114.0(2)   |
| N1-C1-C14   | 104.66(18) | C2-C1-C14   | 141.3(2)   |
| C3-C2-C1    | 119.1(2)   | C3-C2-H2    | 120.4      |
| C1-C2-H2    | 120.4      | C2-C3-C4    | 123.2(2)   |
| C2-C3-H3    | 118.4      | C4-C3-H3    | 118.4      |
| C5-C4-C3    | 118.7(2)   | C5-C4-H4    | 120.7      |
| C3-C4-H4    | 120.7      | N1-C5-C4    | 115.3(2)   |
| N1-C5-C6    | 103.31(18) | C4-C5-C6    | 141.4(2)   |
| C7-C6-C11   | 120.6(2)   | C7-C6-C5    | 130.8(2)   |
| C11-C6-C5   | 108.54(19) | C8-C7-C6    | 119.3(2)   |
| C8-C7-H7    | 120.3      | C6-C7-H7    | 120.3      |
| C7-C8-C9    | 119.5(2)   | C7-C8-H8    | 120.2      |

|                |            |                |            |
|----------------|------------|----------------|------------|
| C9-C8-H8       | 120.2      | C10-C9-C8      | 123.1(2)   |
| C10-C9-CI1     | 119.05(19) | C8-C9-CI1      | 117.85(18) |
| C9-C10-C11     | 118.2(2)   | C9-C10-H10     | 120.9      |
| C11-C10-H10    | 120.9      | C10-C11-C6     | 119.2(2)   |
| C10-C11-C12    | 133.4(2)   | C6-C11-C12     | 107.42(19) |
| N1-C12-C13     | 106.18(18) | N1-C12-C11     | 104.13(18) |
| C13-C12-C11    | 149.7(2)   | C14-C13-C12    | 106.73(19) |
| C14-C13-Si1    | 130.89(17) | C12-C13-Si1    | 122.22(16) |
| C13-C14-C1     | 108.9(2)   | C13-C14-C15    | 128.5(2)   |
| C1-C14-C15     | 122.6(2)   | C16A-C15-C14   | 126.4(16)  |
| C16-C15-C14    | 124.0(5)   | C16-C15-C17    | 121.6(6)   |
| C14-C15-C17    | 114.4(4)   | C16A-C15-C17A  | 121.4(17)  |
| C14-C15-C17A   | 111.9(11)  | C15-C16-H16A   | 120.0      |
| C15-C16-H16B   | 120.0      | H16A-C16-H16B  | 120.0      |
| C15-C17-H17A   | 109.5      | C15-C17-H17B   | 109.5      |
| H17A-C17-H17B  | 109.5      | C15-C17-H17C   | 109.5      |
| H17A-C17-H17C  | 109.5      | H17B-C17-H17C  | 109.5      |
| C15-C16A-H16C  | 120.0      | C15-C16A-H16D  | 120.0      |
| H16C-C16A-H16D | 120.0      | C15-C17A-H17D  | 109.5      |
| C15-C17A-H17E  | 109.5      | H17D-C17A-H17E | 109.5      |
| C15-C17A-H17F  | 109.5      | H17D-C17A-H17F | 109.5      |
| H17E-C17A-H17F | 109.5      | Si1-C18-H18A   | 109.5      |
| Si1-C18-H18B   | 109.5      | H18A-C18-H18B  | 109.5      |
| Si1-C18-H18C   | 109.5      | H18A-C18-H18C  | 109.5      |
| H18B-C18-H18C  | 109.5      | Si1-C19-H19A   | 109.5      |
| Si1-C19-H19B   | 109.5      | H19A-C19-H19B  | 109.5      |
| Si1-C19-H19C   | 109.5      | H19A-C19-H19C  | 109.5      |
| H19B-C19-H19C  | 109.5      | Si1-C20-H20A   | 109.5      |
| Si1-C20-H20B   | 109.5      | H20A-C20-H20B  | 109.5      |
| Si1-C20-H20C   | 109.5      | H20A-C20-H20C  | 109.5      |
| H20B-C20-H20C  | 109.5      |                |            |

**Table S6.** Torsion angles ( $^{\circ}$ ) for compound **3c**.

|               |           |              |           |
|---------------|-----------|--------------|-----------|
| C12-N1-C1-C2  | 177.0(2)  | C5-N1-C1-C2  | 0.1(3)    |
| C12-N1-C1-C14 | -0.2(3)   | C5-N1-C1-C14 | -177.1(2) |
| N1-C1-C2-C3   | 0.2(3)    | C14-C1-C2-C3 | 175.8(3)  |
| C1-C2-C3-C4   | -0.2(4)   | C2-C3-C4-C5  | -0.2(4)   |
| C12-N1-C5-C4  | -177.3(2) | C1-N1-C5-C4  | -0.5(3)   |
| C12-N1-C5-C6  | 1.2(3)    | C1-N1-C5-C6  | 178.0(2)  |



|                 |             |                  |             |
|-----------------|-------------|------------------|-------------|
| C3-C4-C5-N1     | 0.4(3)      | C3-C4-C5-C6      | -177.2(3)   |
| N1-C5-C6-C7     | 179.5(2)    | C4-C5-C6-C7      | -2.7(5)     |
| N1-C5-C6-C11    | -0.9(2)     | C4-C5-C6-C11     | 176.9(3)    |
| C11-C6-C7-C8    | 0.2(4)      | C5-C6-C7-C8      | 179.8(2)    |
| C6-C7-C8-C9     | 0.0(4)      | C7-C8-C9-C10     | -0.6(4)     |
| C7-C8-C9-C11    | -179.77(19) | C8-C9-C10-C11    | 1.0(4)      |
| C11-C9-C10-C11  | -179.85(17) | C9-C10-C11-C6    | -0.8(3)     |
| C9-C10-C11-C12  | 179.5(2)    | C7-C6-C11-C10    | 0.2(3)      |
| C5-C6-C11-C10   | -179.5(2)   | C7-C6-C11-C12    | -180.0(2)   |
| C5-C6-C11-C12   | 0.4(3)      | C1-N1-C12-C13    | 0.2(3)      |
| C5-N1-C12-C13   | 177.49(19)  | C1-N1-C12-C11    | -178.35(18) |
| C5-N1-C12-C11   | -1.0(3)     | C10-C11-C12-N1   | -179.9(2)   |
| C6-C11-C12-N1   | 0.3(2)      | C10-C11-C12-C13  | 3.0(6)      |
| C6-C11-C12-C13  | -176.8(4)   | N1-C12-C13-C14   | -0.1(2)     |
| C11-C12-C13-C14 | 177.0(4)    | N1-C12-C13-Si1   | 175.76(16)  |
| C11-C12-C13-Si1 | -7.1(5)     | C20-Si1-C13-C14  | 122.7(2)    |
| C18-Si1-C13-C14 | 4.3(3)      | C19-Si1-C13-C14  | -118.3(2)   |
| C20-Si1-C13-C12 | -52.0(2)    | C18-Si1-C13-C12  | -170.5(2)   |
| C19-Si1-C13-C12 | 66.9(2)     | C12-C13-C14-C1   | 0.0(3)      |
| Si1-C13-C14-C1  | -175.36(18) | C12-C13-C14-C15  | -177.5(2)   |
| Si1-C13-C14-C15 | 7.2(4)      | N1-C1-C14-C13    | 0.1(3)      |
| C2-C1-C14-C13   | -175.8(3)   | N1-C1-C14-C15    | 177.7(2)    |
| C2-C1-C14-C15   | 1.9(5)      | C13-C14-C15-C16A | -128.(2)    |
| C1-C14-C15-C16A | 55.(2)      | C13-C14-C15-C16  | 59.7(7)     |
| C1-C14-C15-C16  | -117.4(6)   | C13-C14-C15-C17  | -121.7(6)   |
| C1-C14-C15-C17  | 61.2(6)     | C13-C14-C15-C17A | 58.5(12)    |
| C1-C14-C15-C17A | -118.6(12)  |                  |             |

---

## 7. Photophysical Studies

Absorption spectra were measured on a Varian Cary 100 double-beam UV-Vis-NIR spectrometer and baseline-corrected. Steady-state photoluminescence excitation and emission spectra were recorded on a FluoTime300 spectrometer from PicoQuant equipped with a 300 W ozone-free Xe lamp (250-900 nm), a 10 W Xe flash-lamp (250-900 nm, pulse width < 10  $\mu$ s) with repetition rates of 0.1 – 300 Hz, an excitation monochromator (Czerny-Turner 2.7 nm/mm dispersion, 1200 grooves/mm, blazed at 300 nm), diode lasers (pulse width < 80 ps) operated by a computer-controlled laser

driver PDL-820 (repetition rate up to 80 MHz, burst mode for slow and weak decays), two emission monochromators (Czerny-Turner, selectable gratings blazed at 500 nm with 2.7 nm/mm dispersion and 1200 grooves/mm, or blazed at 1250 nm with 5.4 nm/mm dispersion and 600 grooves/mm), Glan-Thompson polarizers for excitation (Xe-lamps) and emission, a Peltier-thermostated sample holder from Quantum Northwest (-40 °C – 105 °C), and two detectors, namely a PMA Hybrid 40 (transit time spread FWHM < 120 ps, 300 – 720 nm) and a R5509-42 NIR-photomultiplier tube (transit time spread FWHM 1.5 ns, 300-1400 nm) with external cooling (-80 °C) from Hamamatsu.

Steady-state and fluorescence lifetimes were recorded in TCSPC mode by a PicoHarp 300 (minimum base resolution 4 ps). Emission and excitation spectra were corrected for source intensity (lamp and grating) by standard correction curves. Lifetime analysis was performed using the commercial FluoFit software. The quality of the fit was assessed by minimizing the reduced chi squared function ( $\chi^2$ ) and visual inspection of the weighted residuals and their autocorrelation. Photoluminescence quantum yields were measured with a Hamamatsu Photonics absolute PL quantum yield measurement system (C9920-02) equipped with a L9799-01 CW Xenon light source (150 W), monochromator, C7473 photonic multi-channel analyzer, integrating sphere and employing U6039-05 PLQY measurement software (Hamamatsu Photonics, Ltd., Shizuoka, Japan). All solvents used were of spectrometric grade (Uvasol®). The fluorescence rate constant ( $k_F$ ) and the non-radiative deactivation rate constant ( $k_{NR}$ ) according to the following equations:

$$k_F = \frac{\Phi_F}{\tau} \quad (\text{eq. 1})$$

$$k_{nr} = k_{IC} + k_{ISC} \quad (\text{eq. 2})$$

$$\tau = \frac{1}{k_F + k_{IC} + k_{ISC}} \quad (\text{eq. 3})$$

$$k_{IC} + k_{ISC} = \frac{1 - \Phi_F}{\tau} \quad (\text{eq. 4})$$

where  $k_{IC}$  is the internal conversion rate constant and  $k_{ISC}$  is the intersystem crossing rate constant.

## 7.1. Photoluminescence Measurements at Room Temperature

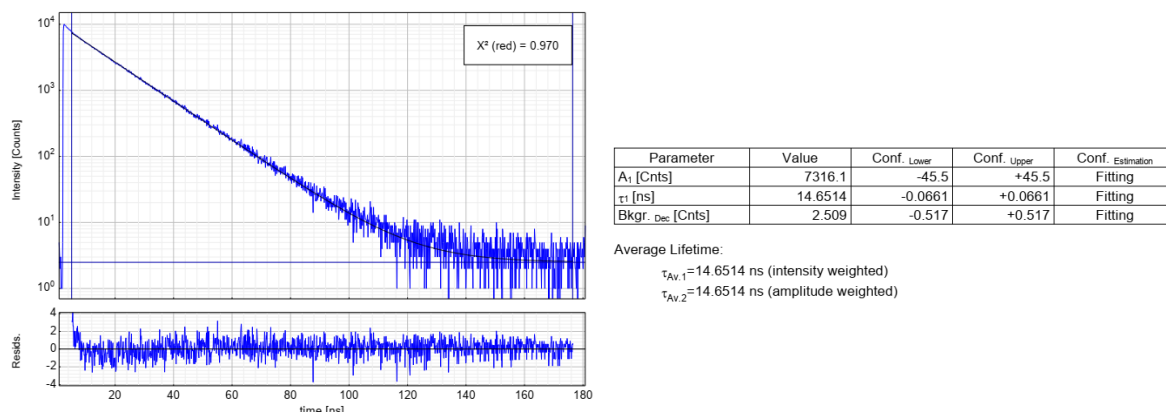

**Figure S3.** Left: time-resolved photoluminescence decay of **3a** in an air-saturated DCM solution at 298 K, including the residuals ( $\lambda_{exc} = 310$  nm,  $\lambda_{em} = 500$  nm). Right: fitting parameters including pre-exponential factors and confidence limits.

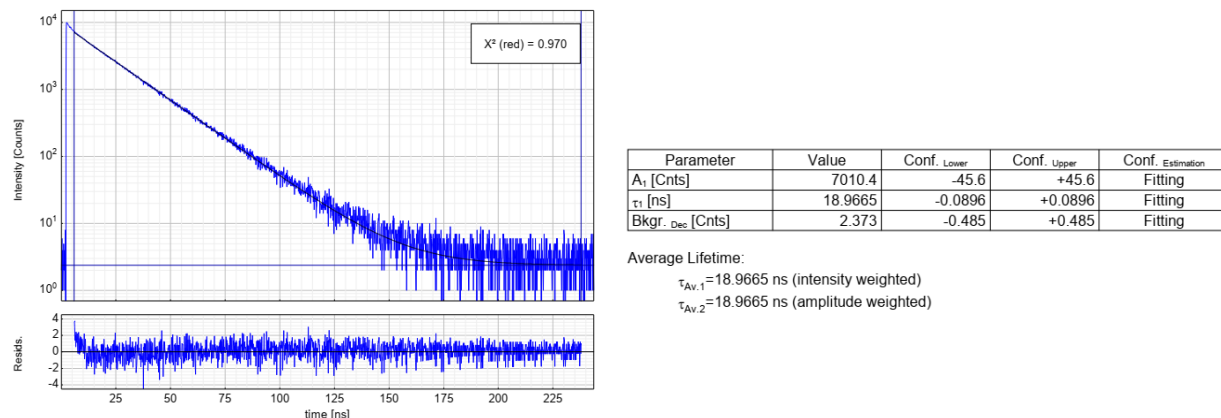

**Figure S4.** Left: time-resolved photoluminescence decay of **3a** in an Ar-saturated DCM solution at 298 K, including the residuals ( $\lambda_{exc} = 310$  nm,  $\lambda_{em} = 500$  nm). Right: fitting parameters including pre-exponential factors and confidence limits.

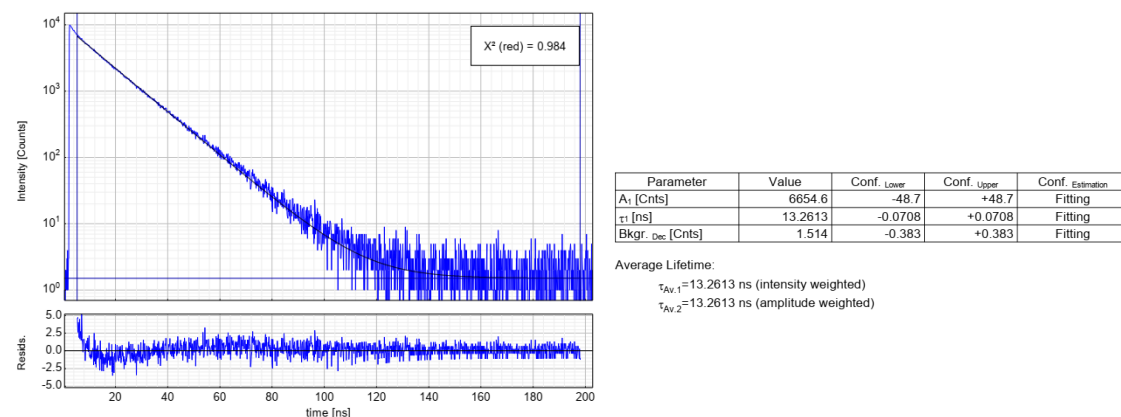

**Figure S5.** Left: time-resolved photoluminescence decay of **3b** in an air-saturated DCM solution at 298 K, including the residuals ( $\lambda_{exc} = 310$  nm,  $\lambda_{em} = 500$  nm). Right: fitting parameters including pre-exponential factors and confidence limits.

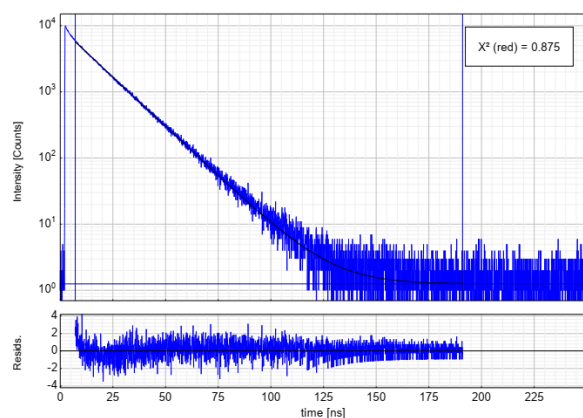

| Parameter         | Value   | Conf. Lower | Conf. Upper | Conf. Estimation |
|-------------------|---------|-------------|-------------|------------------|
| $A_1$ [Cnts]      | 5709.3  | -39.8       | +39.8       | Fitting          |
| $\tau_1$ [ns]     | 14.5361 | -0.0735     | +0.0735     | Fitting          |
| Bkgr. Dec. [Cnts] | 1.255   | -0.377      | +0.377      | Fitting          |

Average Lifetime:

$$\tau_{Av,1} = 14.5361 \text{ ns (intensity weighted)}$$

$$\tau_{Av,2} = 14.5361 \text{ ns (amplitude weighted)}$$

**Figure S6.** Left: time-resolved photoluminescence decay of **3b** in an Ar-saturated DCM solution at 298 K, including the residuals ( $\lambda_{exc} = 310 \text{ nm}$ ,  $\lambda_{em} = 500 \text{ nm}$ ). Right: fitting parameters including pre-exponential factors and confidence limits.

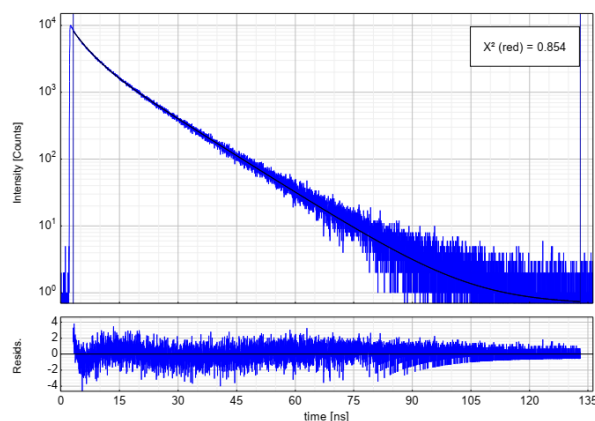

| Parameter         | Value   | Conf. Lower | Conf. Upper | Conf. Estimation |
|-------------------|---------|-------------|-------------|------------------|
| $A_1$ [Cnts]      | 3845.3  | -34.2       | +34.2       | Fitting          |
| $\tau_1$ [ns]     | 11.8293 | -0.0687     | +0.0687     | Fitting          |
| $A_2$ [Cnts]      | 4330.0  | -91.4       | +91.4       | Fitting          |
| $\tau_2$ [ns]     | 3.7729  | -0.0835     | +0.0835     | Fitting          |
| Bkgr. Dec. [Cnts] | 0.675   | -0.371      | +0.371      | Fitting          |

Average Lifetime:

$$\tau_{Av,1} = 9.7004 \text{ ns (intensity weighted)}$$

$$\tau_{Av,2} = 7.5623 \text{ ns (amplitude weighted)}$$

**Figure S7.** Left: time-resolved photoluminescence decay of **3c** in an air-saturated DCM solution at 298 K, including the residuals ( $\lambda_{exc} = 310 \text{ nm}$ ,  $\lambda_{em} = 500 \text{ nm}$ ). Right: fitting parameters including pre-exponential factors and confidence limits.

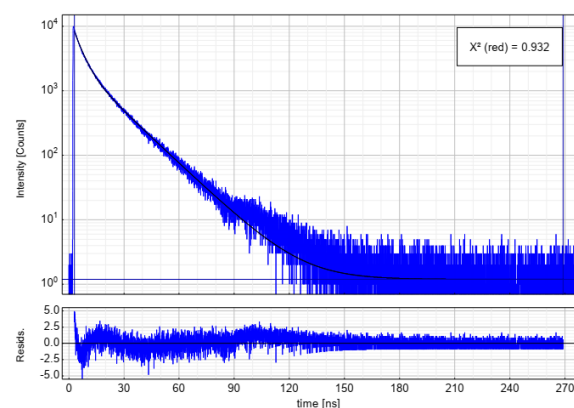

| Parameter         | Value  | Conf. Lower | Conf. Upper | Conf. Estimation |
|-------------------|--------|-------------|-------------|------------------|
| $A_1$ [Cnts]      | 2540.8 | -37.1       | +37.1       | Fitting          |
| $\tau_1$ [ns]     | 16.153 | -0.149      | +0.149      | Fitting          |
| $A_2$ [Cnts]      | 5789   | -125        | +125        | Fitting          |
| $\tau_2$ [ns]     | 4.3199 | -0.0942     | +0.0942     | Fitting          |
| Bkgr. Dec. [Cnts] | 1.191  | -0.316      | +0.316      | Fitting          |

Average Lifetime:

$$\tau_{Av,1} = 11.673 \text{ ns (intensity weighted)}$$

$$\tau_{Av,2} = 7.929 \text{ ns (amplitude weighted)}$$

**Figure S8.** Left: time-resolved photoluminescence decay of **3c** in an Ar-saturated DCM solution at 298 K, including the residuals ( $\lambda_{exc} = 310 \text{ nm}$ ,  $\lambda_{em} = 500 \text{ nm}$ ). Right: fitting parameters including pre-exponential factors and confidence limits.

## 7.2. Photoluminescence Measurements at Low Temperature

The emission spectra of compounds **3a**, **3b** and **3c** at low temperature were also measured and are illustrated in Figure S9. In the glassy matrix (DCM:MeOH 1:1) at 77 K, where solvatochromic stabilization by interaction with the fluid environment is diminished, all the molecules show a blue shift with respect to room temperature, yielding  $\lambda_{\max}$  **3a** = 488 nm,  $\lambda_{\max}$  **3b** = 470 nm and  $\lambda_{\max}$  **3c** = 483 nm; and in all cases, a small vibrational shoulder arises. As observed, the substituent-dependent blue shift remains the same as at room temperature. The photophysical properties of these compounds were also measured at low temperature (Table S6).

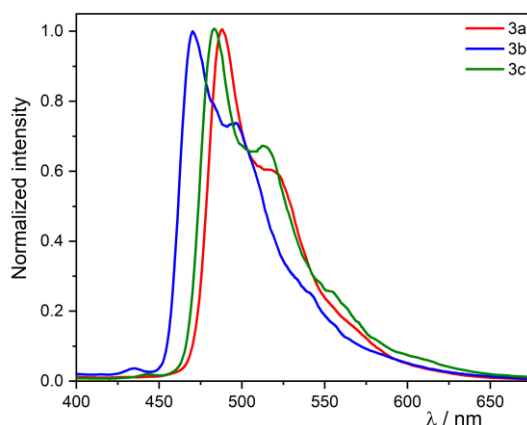

**Figure S9.** Photoluminescence spectra (bold) of **3a** (red), **3b** (blue) and **3c** (green) ( $\lambda_{\text{exc}} = 325$  nm) at 77 K in a DCM:MeOH 1:1 frozen glassy matrix. All solutions were optically diluted ( $A < 0.1$ ). The spectra are normalized to the highest intensity.

**Table S7.** Fluorescence quantum yields ( $\Phi_F$ ), excited state luminescence lifetimes ( $\tau$ ), radiative ( $k_F$ ) and non-radiative deactivation rate constants ( $k_{\text{NR}}$ ) of the compounds in a DCM:MeOH frozen glassy matrix at 77K. \*Calculated using the amplitude-weighted average lifetime ( $\tau_{\text{av\_amp}}$ ).

| Sample                                | <b>3a</b> | <b>3b</b>                                                                                                   | <b>3c</b>                                                                                                |                                                                                                              |
|---------------------------------------|-----------|-------------------------------------------------------------------------------------------------------------|----------------------------------------------------------------------------------------------------------|--------------------------------------------------------------------------------------------------------------|
| $\Phi_F$ (77K) $\pm 4$<br>/ %         | 95        | 67                                                                                                          | 71                                                                                                       |                                                                                                              |
| $\tau$ (77K) / ns                     |           | $\tau_1 = 24.20 \pm 0.12$ (77%);<br>$\tau_2 = 11.4 \pm 0.3$ (23%)<br>$\tau_{\text{av\_amp}} = 19.2 \pm 0.8$ | $\tau_1 = 18.8 \pm 0.1$ (60%);<br>$\tau_2 = 5.3 \pm 0.2$ (40%)<br>$\tau_{\text{av\_amp}} = 13.4 \pm 0.6$ | $\tau_1 = 16.20 \pm 0.11$ (49%);<br>$\tau_2 = 4.80 \pm 0.14$ (51%)<br>$\tau_{\text{av\_amp}} = 10.3 \pm 0.6$ |
| $k_F / 10^6 \text{ s}^{-1}$           |           | $5.1 \pm 0.5^*$                                                                                             | $5.0 \pm 0.6^*$                                                                                          | $6.9 \pm 0.8^*$                                                                                              |
| $k_{\text{NR}} / 10^6 \text{ s}^{-1}$ |           | $0.015 \pm 0.005^*$                                                                                         | $1.7 \pm 0.9^*$                                                                                          | $2.8 \pm 0.3^*$                                                                                              |

In a frozen glassy matrix at 77 K, charge transfer states are destabilized, lowering the n- $\pi$  character of the S<sub>1</sub>. Therefore, the emission at 77 K is originated mostly from  $\pi$ - $\pi$  states. This effect is verified by the values of  $k_F$ , which are similar in all cases, as opposed to room temperature. As depicted in Table 2,  $\phi_F$  for **3a** is close to unity, hence  $k_{NR}$  is almost insignificant. Instead, for **3b** and **3c**, the higher  $k_{NR}$  (yet comparable) values are caused by enhanced densities of vibrational states due to the presence of the added substituents that favour radiationless deactivation pathways ( $k_{IC}$ ).

*Time-resolved photoluminescence decay curves:*

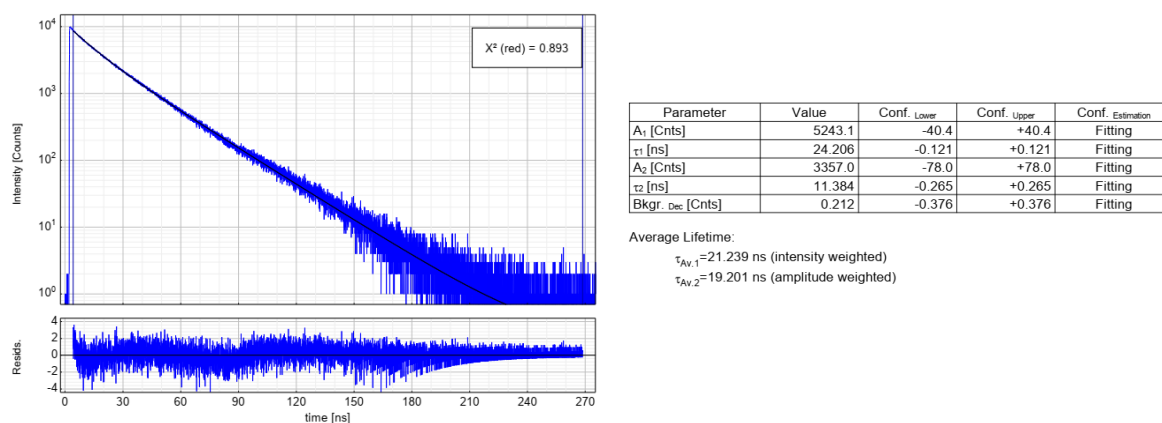

**Figure S10.** Left: time-resolved photoluminescence decay of **3a** in a frozen glassy matrix of DCM/MeOH (V:V = 1:1) at 77 K, including the residuals ( $\lambda_{exc}$  = 317 nm,  $\lambda_{em}$  = 490 nm). Right: fitting parameters including pre-exponential factors and confidence limits.

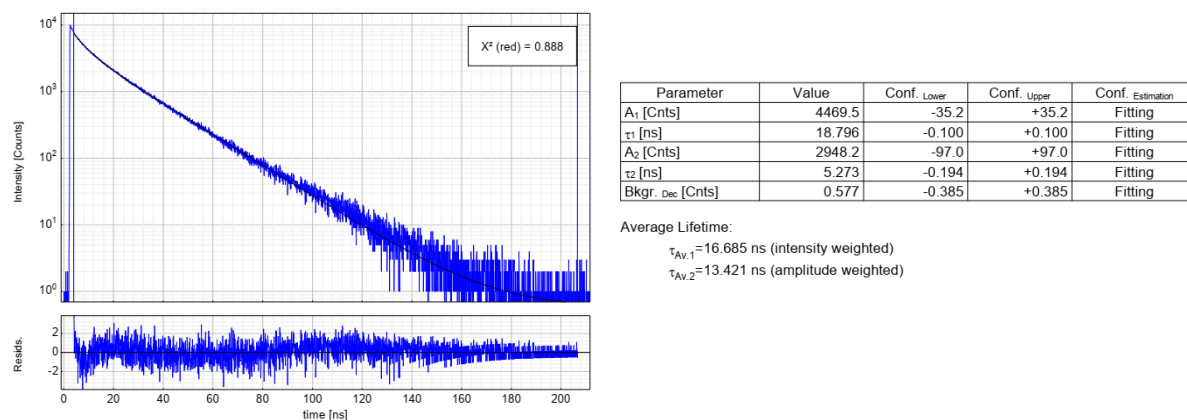

**Figure S11.** Left: time-resolved photoluminescence decay of **3b** in a frozen glassy matrix of DCM/MeOH (V:V = 1:1) at 77 K, including the residuals ( $\lambda_{exc}$  = 317 nm,  $\lambda_{em}$  = 470 nm). Right: fitting parameters including pre-exponential factors and confidence limits.

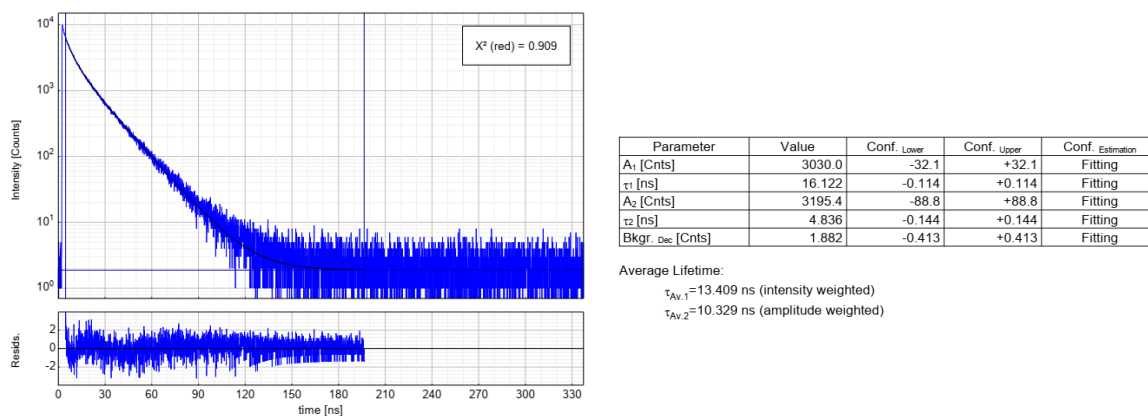

**Figure S12.** Left: time-resolved photoluminescence decay of **3c** in a frozen glassy matrix of DCM/MeOH (V:V = 1:1) at 77 K, including the residuals ( $\lambda_{\text{exc}} = 317$  nm,  $\lambda_{\text{em}} = 470$  nm). Right: fitting parameters including pre-exponential factors and confidence limits.

## 8. Computational Study

### 8.1. Computational Details

Ground-state calculations were performed in the DFT framework with the Gaussian 09 Rev. D.01 quantum chemistry package.<sup>[5]</sup> The B3LYP hybrid functional<sup>[6]</sup> with a 6-31+G\* basis set was used. Van-der-Waals interactions were approximatively included by Grimme-D3 dispersion corrections with Becke-Johnson damping (BJ).<sup>[7]</sup> Solvent effects were taken into account using the polarizable continuum model (PCM)<sup>[8]</sup> with UFF atomic radii<sup>[9]</sup> for dichloromethane. Absorption spectra were obtained from time-dependent density functional linear response theory (TDDFT) calculations of the lowest 40 singlet excited states and broadened by Lorentzian distributions with a half-width at half-maximum (HWHM) of 10 nm. Emission energies were determined from the TDDFT optimized S1 geometry. Structures and orbitals were visualized using Avogadro.<sup>[10]</sup> All output files are provided as an electronic supplement.

### 8.2. Calculated Absorption Spectra

The calculated absorption spectra of the INIs **3a**, **3b** and **3c** in dichloromethane are shown in Figure S13.

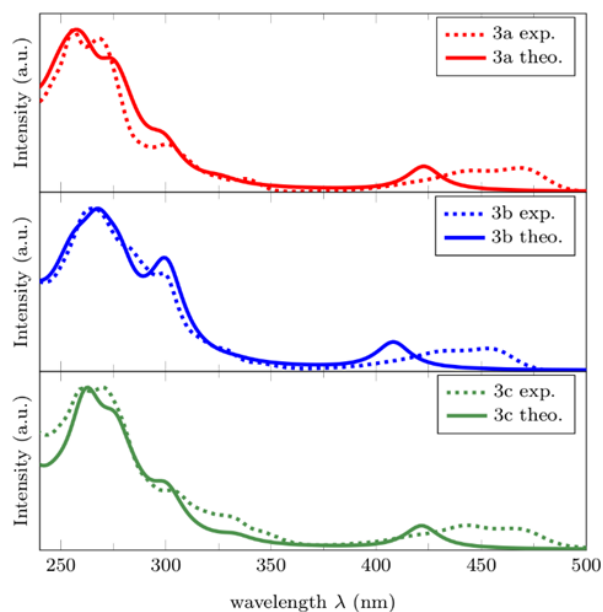

**Figure S13.** Normalized calculated (theo., solid lines) and experimental (exp., dashed lines) UV-vis absorption spectra of **3a**, **3b**, and **3c** in dichloromethane. Theoretical spectra were calculated using TDDFT with the B3LYP functional and 6-31+G\* basis set.

### 8.3. Optimized Geometries

**Table S8.** Optimized geometries in the ground state (GS) and first excited state ( $S_1$ ) of compounds **3a**, **3b** and **3c** calculated with Gaussian 09 Rev. D.01<sup>[5]</sup> and B3LYP with 6-31+G\* basis.

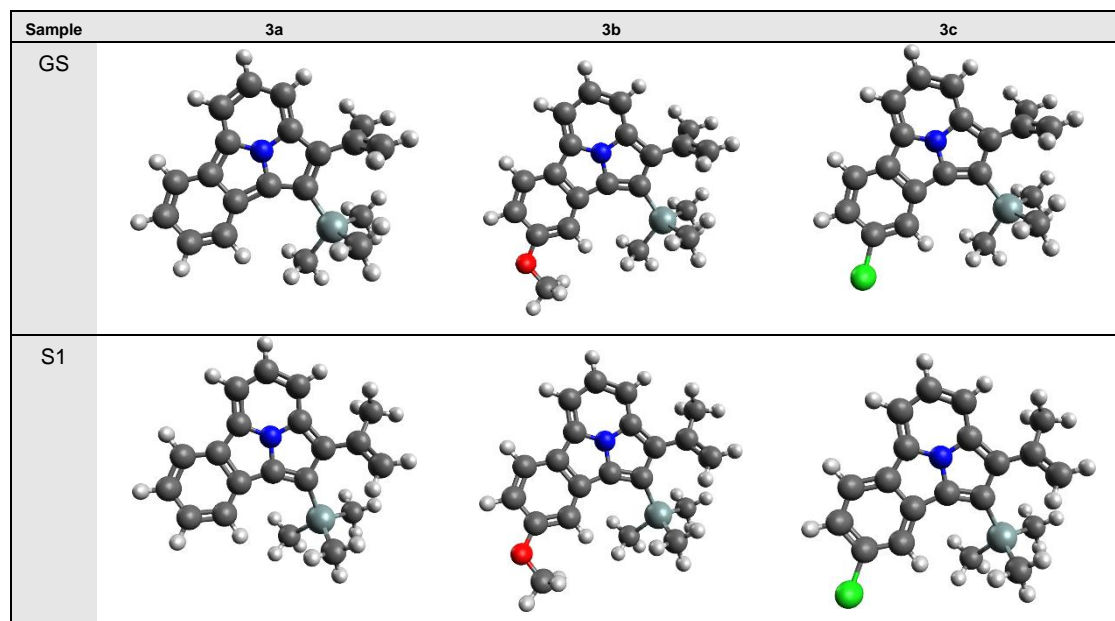



**Table S9.** Selected bond lengths (in Å), angles and dihedrals (in degrees) of the optimized geometries in ground state (GS) and first excited state ( $S_1$ ) of compounds **3a**, **3b** and **3c** calculated with Gaussian 09 Rev. D.01<sup>[5]</sup> and B3LYP with 6-31+G\* basis. The atom labels are shown in Figure S2.

| Sample          | 3a GS  | 3a S1  | 3b GS  | 3b S1  | 3cGS   | 3c S1  |
|-----------------|--------|--------|--------|--------|--------|--------|
| N1 C1           | 1.376  | 1.349  | 1.375  | 1.352  | 1.376  | 1.349  |
| N1 C5           | 1.375  | 1.368  | 1.376  | 1.366  | 1.375  | 1.368  |
| N1 C12          | 1.368  | 1.412  | 1.367  | 1.412  | 1.369  | 1.411  |
| C14 C15         | 1.483  | 1.442  | 1.483  | 1.440  | 1.483  | 1.441  |
| C15 C16         | 1.342  | 1.361  | 1.342  | 1.363  | 1.341  | 1.362  |
| C15 C17         | 1.511  | 1.515  | 1.511  | 1.514  | 1.511  | 1.514  |
| C13 C14         | 1.431  | 1.469  | 1.431  | 1.473  | 1.429  | 1.471  |
| C12 C13         | 1.429  | 1.402  | 1.429  | 1.404  | 1.430  | 1.399  |
| C1 C14          | 1.426  | 1.457  | 1.426  | 1.457  | 1.427  | 1.458  |
| C8 C9           | 1.410  | 1.409  | 1.416  | 1.414  | 1.407  | 1.405  |
| C13 Si1         | 1.888  | 1.888  | 1.888  | 1.885  | 1.890  | 1.890  |
| C13 C14 C15     | 128.0  | 127.4  | 128.0  | 127.3  | 128.0  | 127.4  |
| C16 C15 C17     | 122.1  | 119.5  | 122.1  | 119.3  | 122.1  | 119.4  |
| Si1 C13 C14     | 124.6  | 129.2  | 124.6  | 129.3  | 124.7  | 129.5  |
| C1 C14 C15 C16  | 114.7  | 148.8  | 115.0  | 150.4  | 114.6  | 149.2  |
| C13 C14 C15 C17 | 114.1  | 158.6  | 114.3  | 160.8  | 114.0  | 159.3  |
| Si1 C13 C14 C15 | -5.2   | -24.5  | -5.1   | -25.9  | -5.1   | -24.2  |
| C11 C12 C13 C14 | -177.8 | -175.6 | -178.0 | -175.0 | -177.9 | -175.5 |
| N1 C1 C14 C15   | -179.6 | -170.9 | -180.0 | -170.3 | 179.7  | -170.7 |

## 8.4. Kohn-Sham Orbitals

**Table S10.** Molecular frontier orbitals of compounds **3a**, **3b** and **3c** at the  $S_0$  geometry calculated with Gaussian 09 Rev. D.01<sup>[5]</sup> and B3LYP with 6-31+G\* basis.

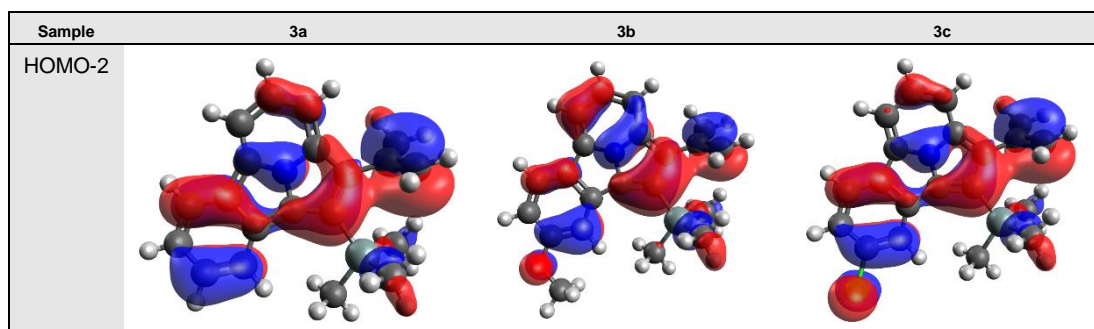

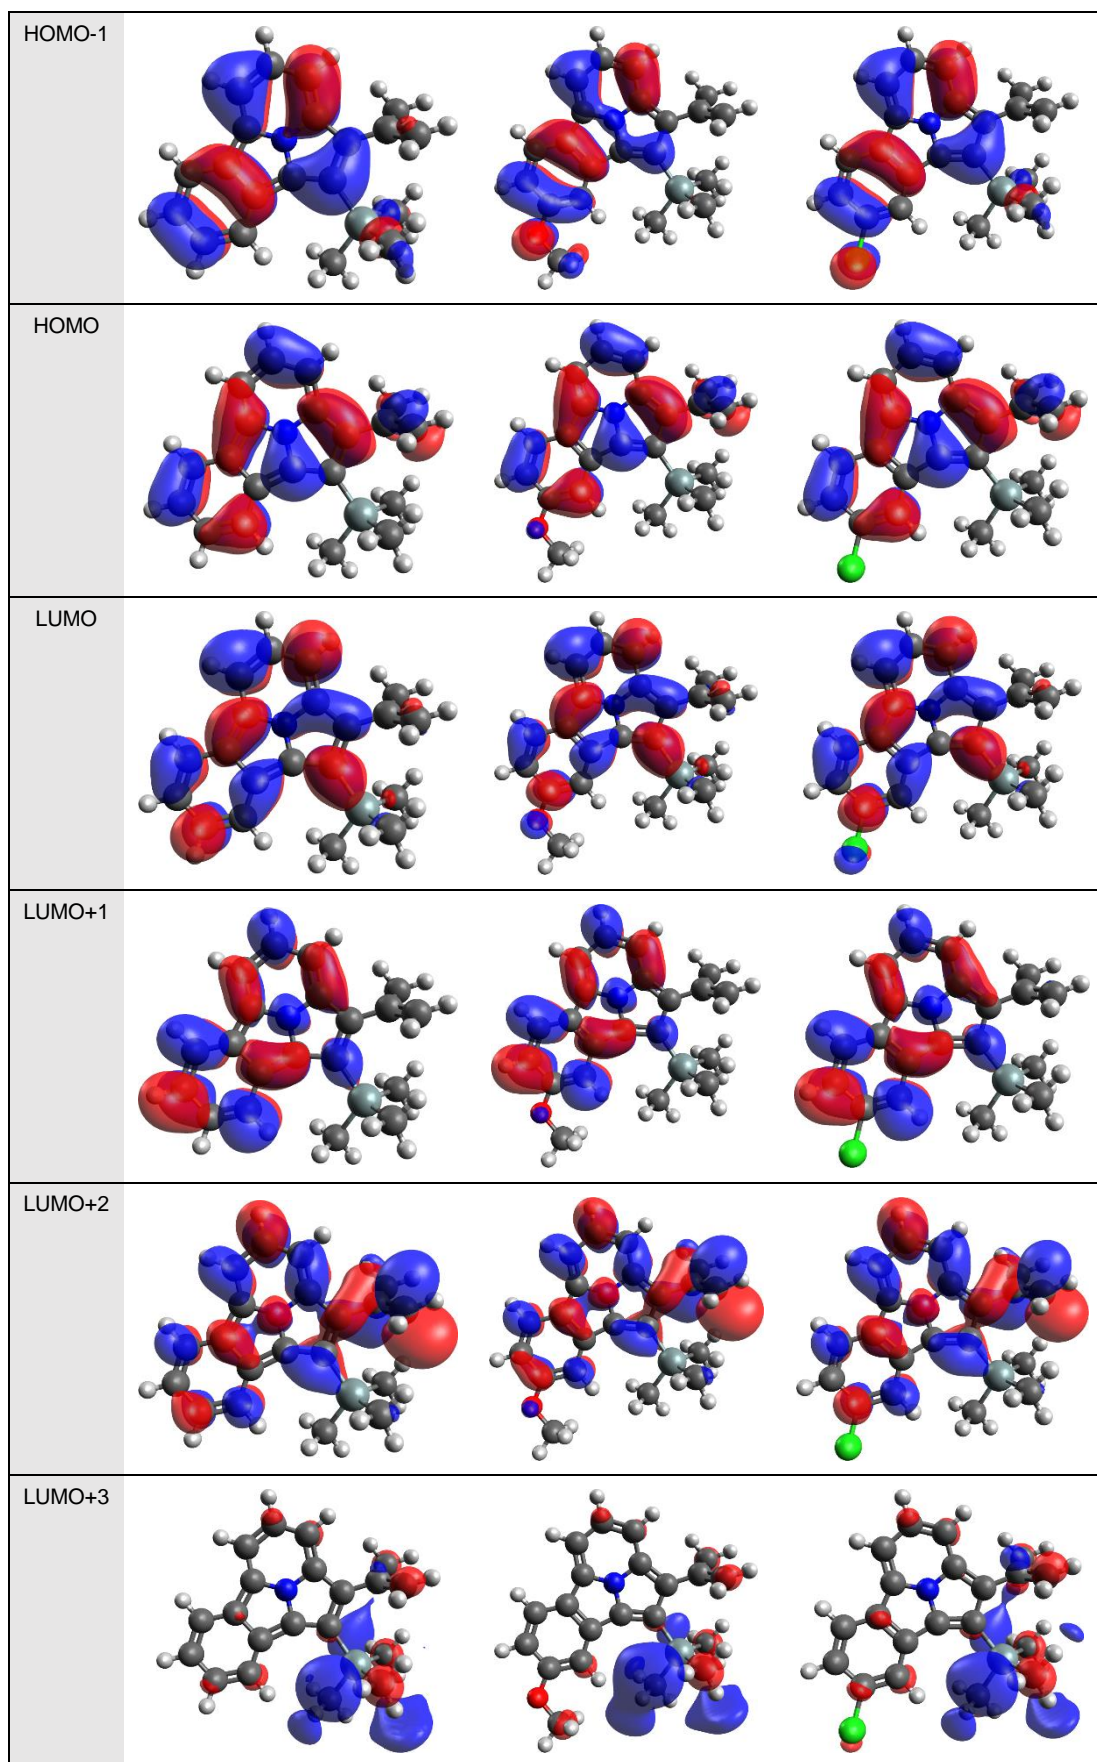

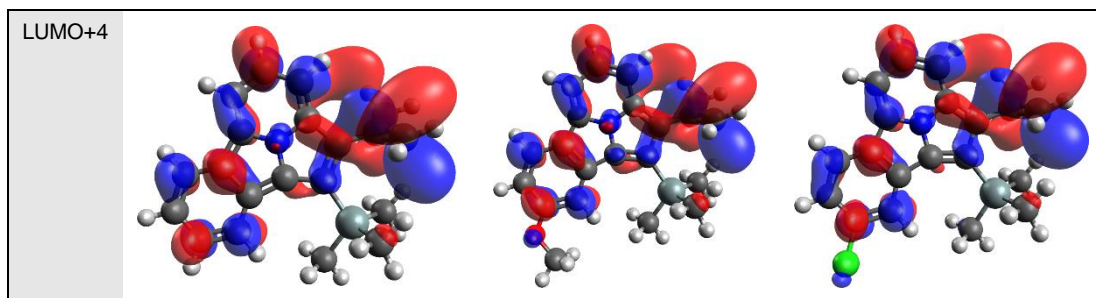

**Table S11.** Molecular frontier orbitals of the  $S_1$  excited state geometry of compounds **3a**, **3b** and **3c** calculated with Gaussian 09 Rev. D.01<sup>[5]</sup> and B3LYP with 6-31+G\* basis.

| Sample | 3a ( $S_1$ geometry) | 3b ( $S_1$ geometry) | 3c ( $S_1$ geometry) |
|--------|----------------------|----------------------|----------------------|
| HOMO-2 |                      |                      |                      |
| HOMO-1 |                      |                      |                      |
| HOMO   |                      |                      |                      |
| LUMO   |                      |                      |                      |

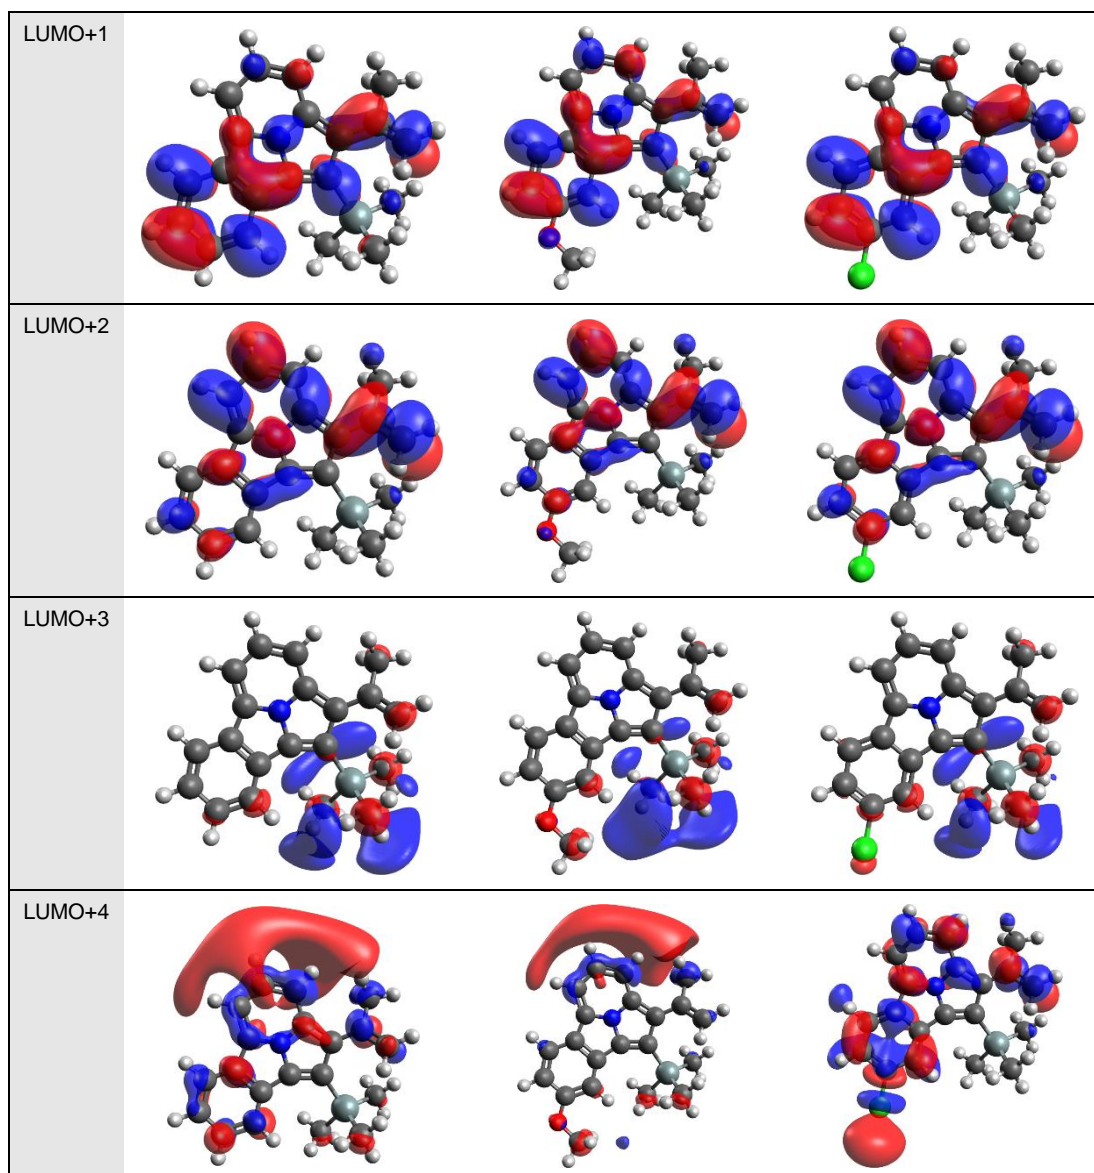

## 8.5. Singlet Excitations

**Table S12.** Calculated excitation wavelengths in nm (larger than 261 nm) and oscillator strengths for excited states of compounds **3a**, **3b** and **3c**. Contributions to the TDDFT eigenvectors larger than 10% are given for each excitation.

| Sample | 3a                                                    | 3b                                                    | 3c                                                    |
|--------|-------------------------------------------------------|-------------------------------------------------------|-------------------------------------------------------|
| 1.     | 423 nm, f=0.137<br>HOMO→LUMO 97%                      | 408 nm, f=0.144<br>HOMO→LUMO 95%                      | 422 nm, f=0.142<br>HOMO→LUMO 97%                      |
| 2.     | 326 nm, f=0.028<br>HOMO→LUMO+1 72%<br>HOMO-1→LUMO 26% | 334 nm, f=0.008<br>HOMO→LUMO+1 52%<br>HOMO-1→LUMO 46% | 333 nm, f=0.040<br>HOMO→LUMO+1 77%<br>HOMO-1→LUMO 21% |
| 3.     | 299 nm, f=0.182<br>HOMO→LUMO+2 60%                    | 301 nm, f=0.461<br>HOMO→LUMO+1 36%                    | 301 nm, f=0.261<br>HOMO→LUMO+2 45%                    |

|    |                                                                          |                                                                                                                  |                                                                          |
|----|--------------------------------------------------------------------------|------------------------------------------------------------------------------------------------------------------|--------------------------------------------------------------------------|
|    | HOMO-1→LUMO 22%<br>HOMO→LUMO+1 11%                                       | HOMO-1→LUMO 31%<br>HOMO→LUMO+2 28%                                                                               | HOMO-1→LUMO 36%<br>HOMO→LUMO+1 11%                                       |
| 4. | 281 nm, f=0.140<br>HOMO-2→LUMO 50%<br>HOMO→LUMO+2 18%<br>HOMO→LUMO+4 14% | 293 nm, f=0.040<br>HOMO-2→LUMO 41%<br>HOMO→LUMO+2 38%<br>HOMO-1→LUMO+1 13%                                       | 285 nm, f=0.096<br>HOMO-2→LUMO 78%<br>HOMO-1→LUMO+1 14%                  |
| 5. | 275 nm, f=0.348<br>HOMO-2→LUMO 33%<br>HOMO-1→LUMO 24%<br>HOMO→LUMO+4 17% | 278 nm, f=0.311<br>HOMO→LUMO+4 25%<br>HOMO→LUMO+2 21%<br>HOMO-2→LUMO 17%<br>HOMO-1→LUMO+1 14%<br>HOMO-1→LUMO 10% | 276 nm, f=0.460<br>HOMO→LUMO+2 37%<br>HOMO-1→LUMO 27%<br>HOMO→LUMO+4 22% |
| 6. | 271 nm, f=0.001<br>HOMO→LUMO+3 88%                                       | 273 nm, f=0.000<br>HOMO→LUMO+3 89%                                                                               | 266 nm, f=0.001<br>HOMO→LUMO+3 78%                                       |
| 7. | 262 nm, f=0.294<br>HOMO→LUMO+4 45%<br>HOMO-3→LUMO 23%<br>HOMO-1→LUMO 12% | 268 nm, f=0.446<br>HOMO-1→LUMO+1 60%<br>HOMO-2→LUMO 22%                                                          | 263 nm, f=0.002<br>HOMO-3→LUMO 75%<br>HOMO-1→LUMO+1 12%                  |
| 8. | 261 nm, f=0.111<br>HOMO-3→LUMO 67%<br>HOMO→LUMO+4 13%                    |                                                                                                                  | 262 nm, f=0.309<br>HOMO-1→LUMO+1 45%<br>HOMO-3→LUMO 15%                  |
| 9. |                                                                          |                                                                                                                  | 262 nm, f=0.435<br>HOMO→LUMO+4 56%<br>HOMO-1→LUMO+1 14%                  |

**Table S13.** Calculated excitation wavelengths in nm (larger than 263 nm) and oscillator strengths for excited states of the  $S_1$ -geometry of compounds **3a**, **3b** and **3c**. Contributions to the TDDFT eigenvectors larger than 10% are given for each excitation.

| Sample | 3a (S1 geometry)                                                         | 3b (S1 geometry)                                                         | 3c (S1 geometry)                                                         |
|--------|--------------------------------------------------------------------------|--------------------------------------------------------------------------|--------------------------------------------------------------------------|
| 1.     | 513 nm, f=0.139<br>HOMO→LUMO 98%                                         | 494 nm, f=0.158<br>HOMO→LUMO 96%                                         | 515 nm, f=0.143<br>HOMO→LUMO 97%                                         |
| 2.     | 356 nm, f=0.054<br>HOMO→LUMO+1 73%<br>HOMO-1→LUMO 19%                    | 362 nm, f=0.008<br>HOMO→LUMO+1 53%<br>HOMO-1→LUMO 39%                    | 366 nm, f=0.074<br>HOMO→LUMO+1 84%<br>HOMO-1→LUMO 12%                    |
| 3.     | 336 nm, f=0.192<br>HOMO→LUMO+2 45%<br>HOMO-1→LUMO 29%<br>HOMO→LUMO+1 23% | 339 nm, f=0.339<br>HOMO→LUMO+1 42%<br>HOMO→LUMO+2 29%<br>HOMO-1→LUMO 25% | 337 nm, f=0.197<br>HOMO→LUMO+2 46%<br>HOMO-1→LUMO 38%<br>HOMO→LUMO+1 12% |
| 4.     | 310 nm, f=0.186<br>HOMO-2→LUMO 56%<br>HOMO-1→LUMO 19%                    | 316 nm, f=0.097<br>HOMO-2→LUMO 60%<br>HOMO→LUMO+2 17%                    | 312 nm, f=0.135<br>HOMO-2→LUMO 77%                                       |

|    |                                                                            |                                                                          |                                                                            |
|----|----------------------------------------------------------------------------|--------------------------------------------------------------------------|----------------------------------------------------------------------------|
|    | HOMO→LUMO+2 18%                                                            | HOMO-1→LUMO 10%                                                          |                                                                            |
| 5. | 292 nm, f=0.509<br>HOMO-2→LUMO 32%<br>HOMO-1→LUMO 27%<br>HOMO→LUMO+2 25%   | 301 nm, f=0.489<br>HOMO→LUMO+2 40%<br>HOMO-2→LUMO 28%<br>HOMO-1→LUMO 21% | 296 nm, f=0.621<br>HOMO-1→LUMO 39%<br>HOMO→LUMO+2 37%<br>HOMO-2→LUMO 12%   |
| 6. | 288 nm, f=0.031<br>HOMO→LUMO+3 91%                                         | 290 nm, f=0.008<br>HOMO→LUMO+3 93%                                       | 284 nm, f=0.010<br>HOMO→LUMO+3 93%                                         |
| 7. | 268 nm, f=0.022<br>HOMO→LUMO+4 52%<br>HOMO→LUMO+5 16%<br>HOMO→LUMO+6 14%   | 275 nm, f=0.284<br>HOMO-1→LUMO+1 72%                                     | 273 nm, f=0.015<br>HOMO→LUMO+4 35%<br>HOMO-1→LUMO+1 29%<br>HOMO→LUMO+5 19% |
| 8. | 264 nm, f=0.014<br>HOMO→LUMO+4 42%<br>HOMO→LUMO+5 26%                      | 267 nm, f=0.022<br>HOMO→LUMO+4 90%                                       | 267 nm, f=0.397<br>HOMO-1→LUMO+1 44%<br>HOMO→LUMO+4 28%<br>HOMO→LUMO+5 11% |
| 9. | 263 nm, f=0.183<br>HOMO-1→LUMO+1 36%<br>HOMO→LUMO+5 29%<br>HOMO-4→LUMO 14% | 263 nm, f=0.148<br>HOMO-1→LUMO+2 42%<br>HOMO→LUMO+6 34%                  | 264 nm, f=0.003<br>HOMO→LUMO+5 64%<br>HOMO→LUMO+4 29%                      |

## 9. References

- (1) G. R. Fulmer, A. J. M. Miller, N. H. Sherden, H. E. Gottlieb, A. Nudelman, B. M. Stoltz, J. E. Bercaw and K. I. Goldberg, *Organometallics*, 2010, **29**, 2176-2179.
- (2) B. Zhou, H. Chen and C. Wang, *J. Am. Chem. Soc.*, 2013, **135**, 1264-1267.
- (3) Y. Kitamura, S. Sako, T. Udzu, A. Tsutsui, T. Maegawa, Y. Monguchi and H. Sajiki, *Chem. Commun.*, 2007, 5069-5071.
- (4) P. J. Stang and T. E. Fisk, *Synthesis*, 1979, **6**, 438-440.
- (5) Gaussian 09, Revision D.01, M. J. Frisch, G. W. Trucks, H. B. Schlegel, G. E. Scuseria, M. A. Robb, J. R. Cheeseman, G. Scalmani, V. Barone, B. Mennucci, G. A. Petersson, H. Nakatsuji, M. Caricato, X. Li, H. P. Hratchian, A. F. Izmaylov, J. Bloino, G. Zheng, J. L. Sonnenberg, M. Hada, M. Ehara, K. Toyota, R. Fukuda, J. Hasegawa, M. Ishida, T. Nakajima, Y. Honda, O. Kitao, H. Nakai, T. Vreven, J. A. Montgomery, Jr., J. E. Peralta, F. Ogliaro, M. Bearpark, J. J. Heyd, E. Brothers, K. N. Kudin, V. N. Staroverov, T. Keith, R. Kobayashi, J. Normand, K. Raghavachari, A. Rendell, J. C. Burant, S. S. Iyengar, J. Tomasi, M. Cossi, N. Rega, J. M. Millam, M. Klene, J. E. Knox, J. B. Cross, V. Bakken, C. Adamo, J. Jaramillo, R. Gomperts, R. E. Stratmann, O. Yazyev, A. J. Austin, R. Cammi, C. Pomelli, J. W. Ochterski, R. L. Martin, K. Morokuma, V. G. Zakrzewski, G. A. Voth, P. Salvador, J. J. Dannenberg, S. Dapprich, A. D. Daniels, O. Farkas, J. B. Foresman, J. V. Ortiz, J. Cioslowski and D. J. Fox, *Gaussian, Inc., Wallingford CT*, 2013.
- (6) A. D. Becke, *J. Chem. Phys.*, 1993, **98**, 5648-5652.
- (7) S. Grimme, S. Ehrlich and L. Goerigk, *J. Comput. Chem.*, 2011, **32**, 1456-1465.

- (8) J. Tomasi, B. Mennucci and R. Cammi, *Chem. Rev.*, 2005, **105**, 2999-3094.
- (9) A. K. Rappe, C. J. Casewit, K. S. Colwell, W. A. Goddard and W. M. Skiff, *J. Am. Chem. Soc.*, 1992, **114**, 10024-10035.
- (10) Avogadro: an open-source molecular builder and visualization tool. Version 1.1.1  
<http://avogadro.cc/>

# 10. NMR Spectra of Products

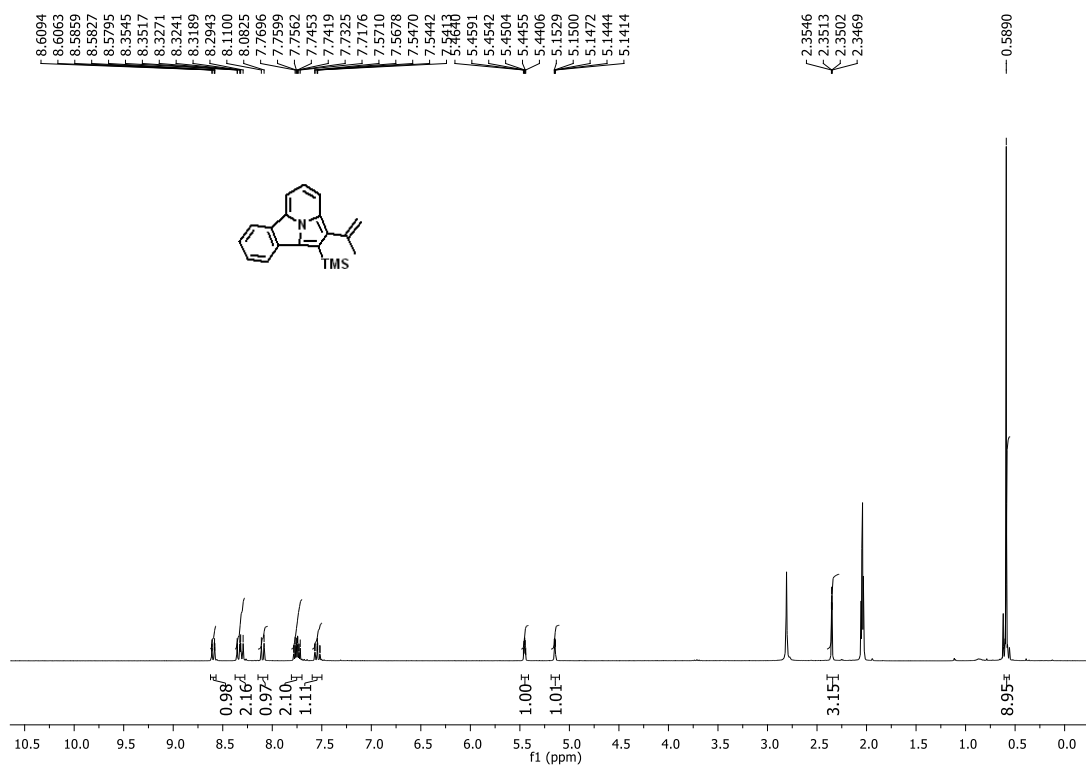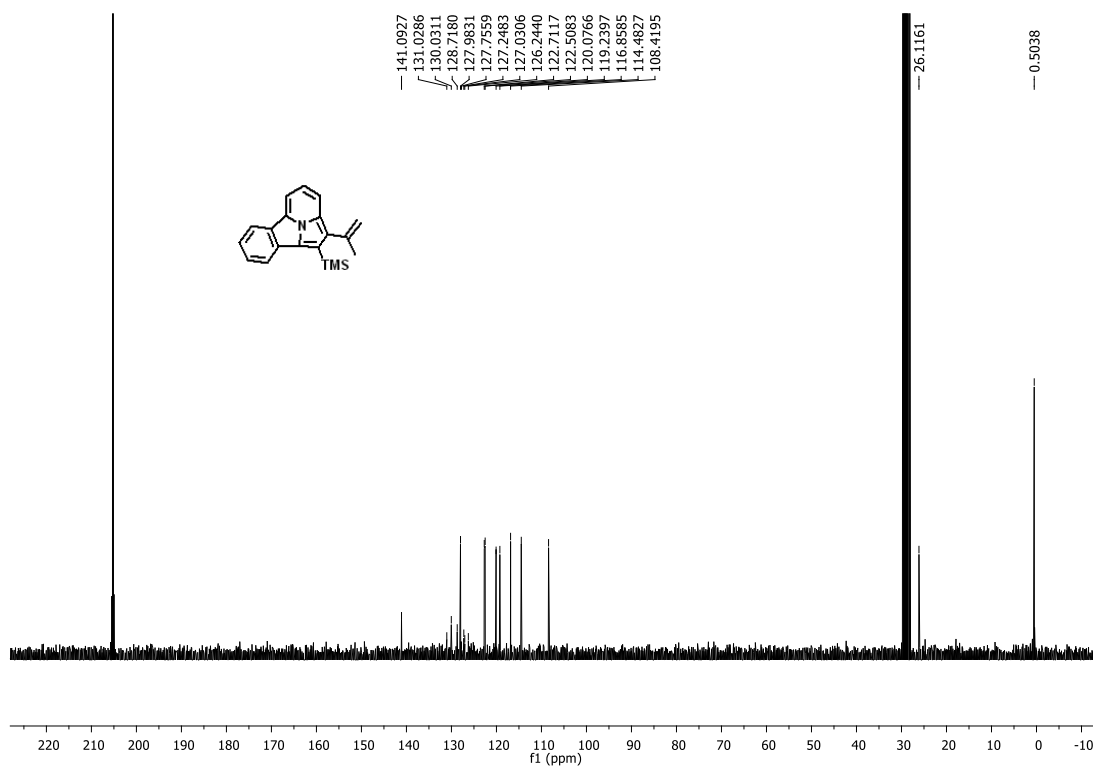



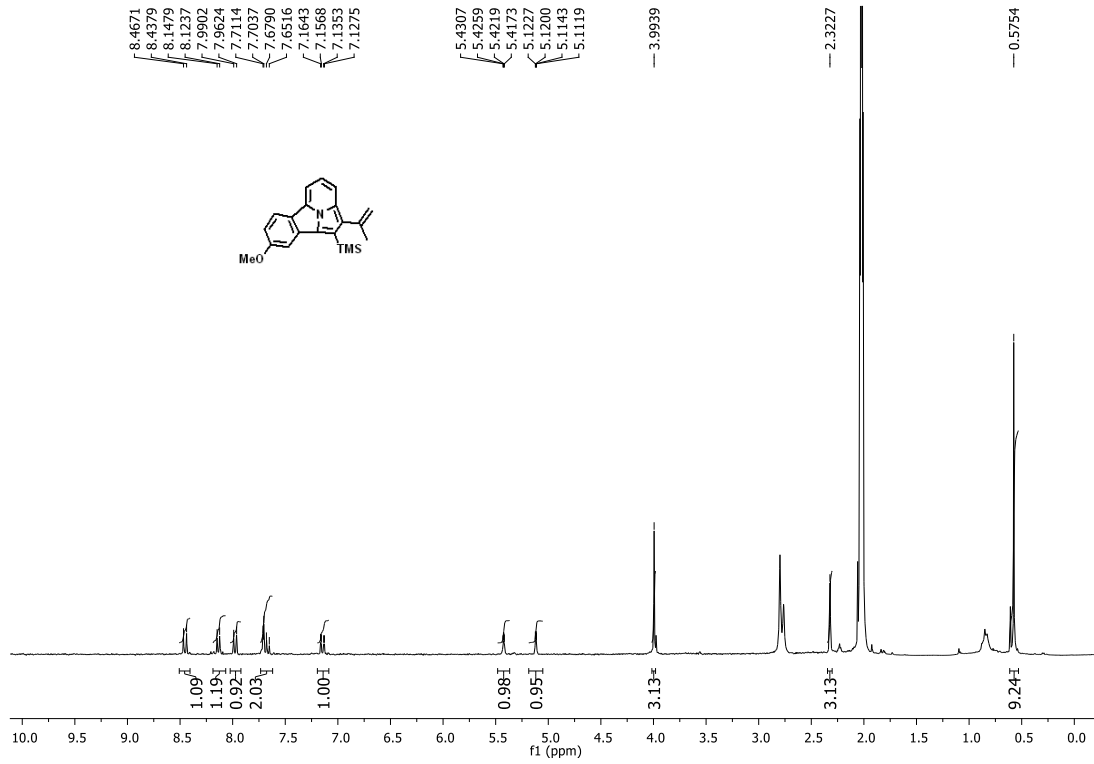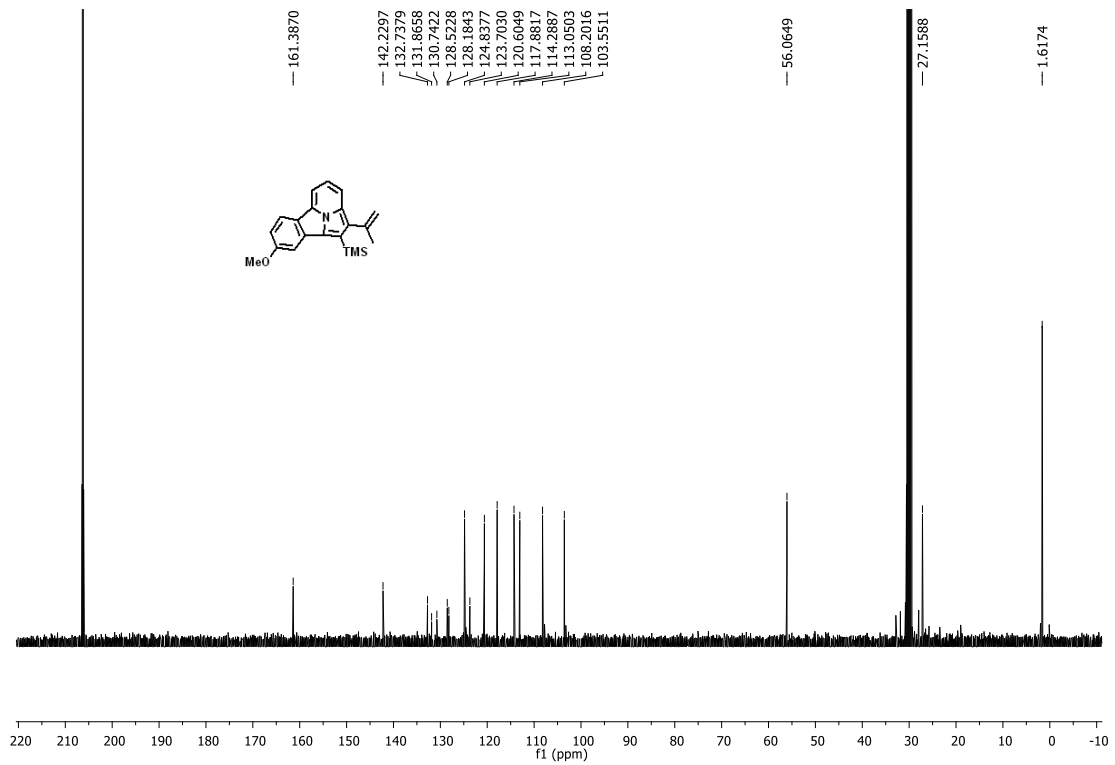

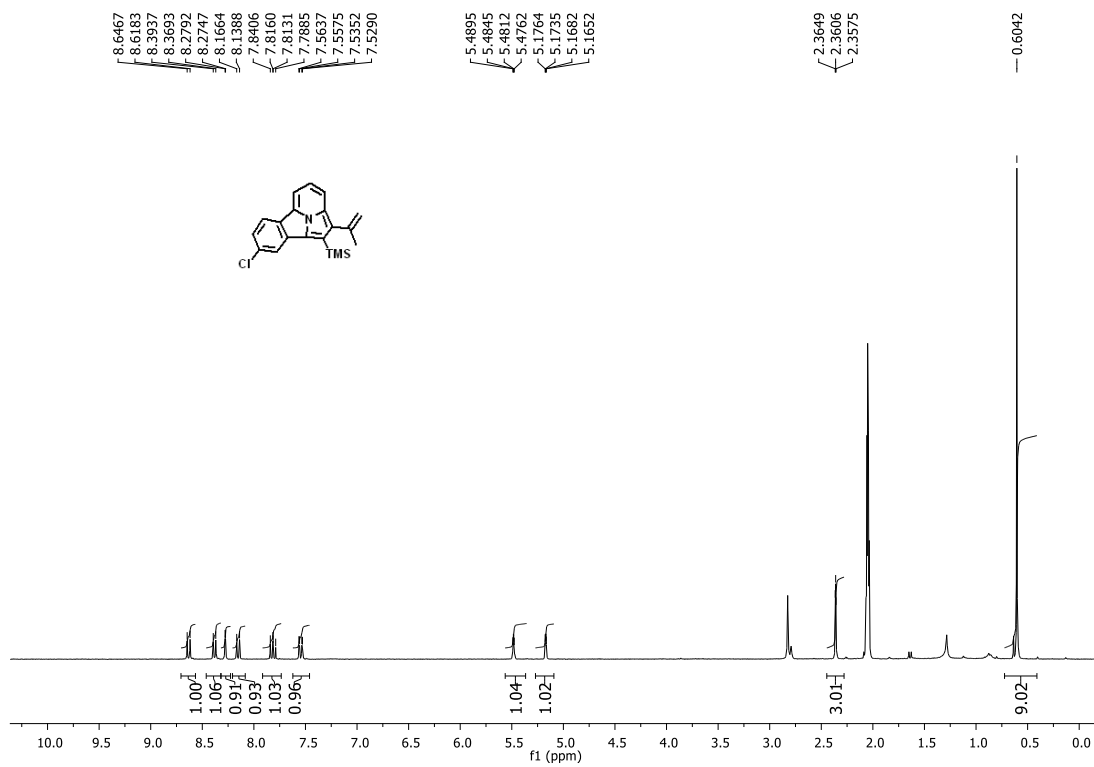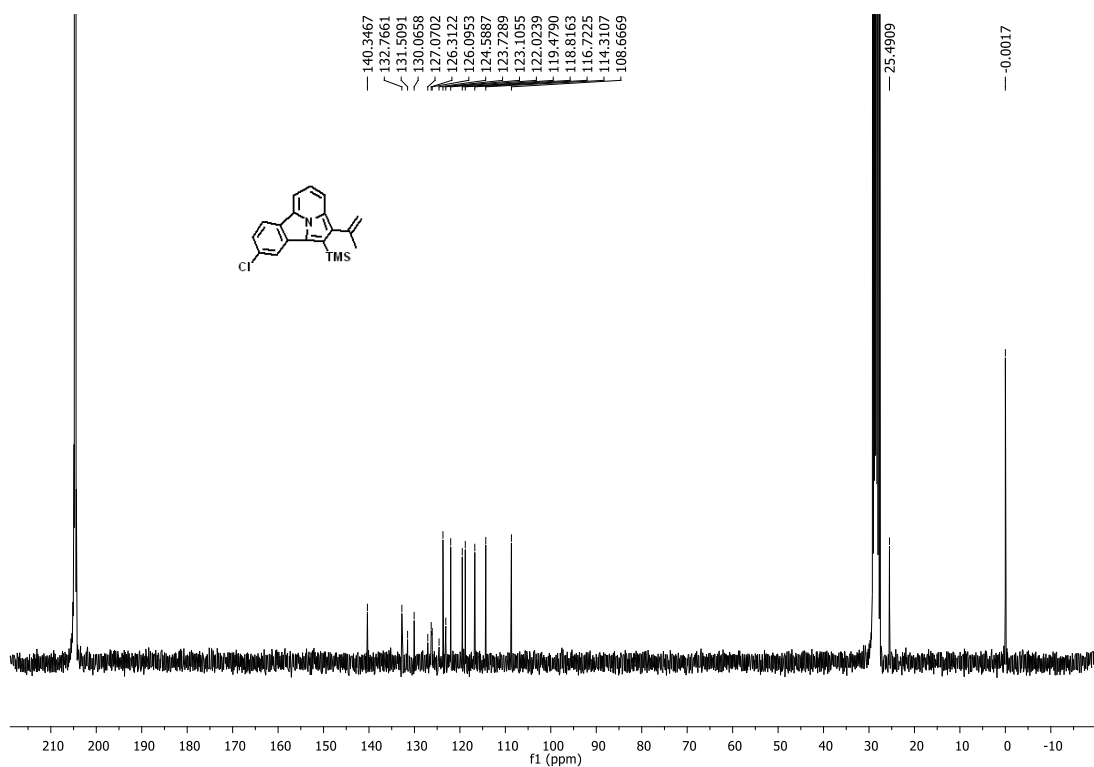

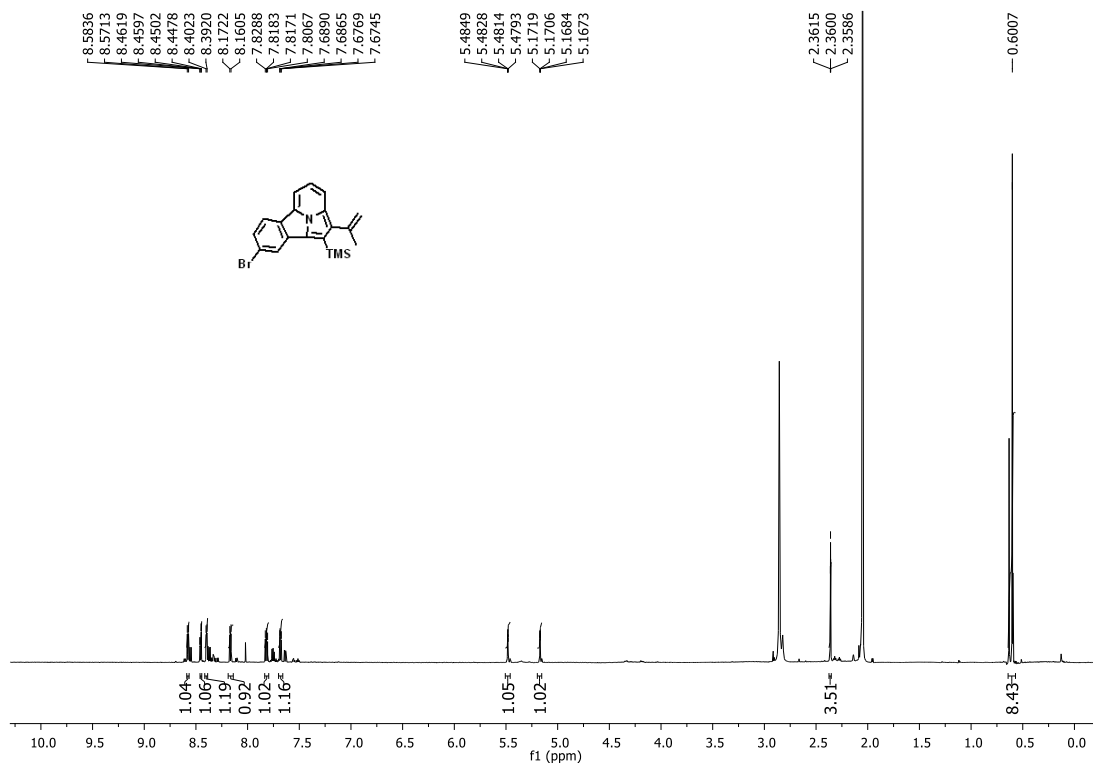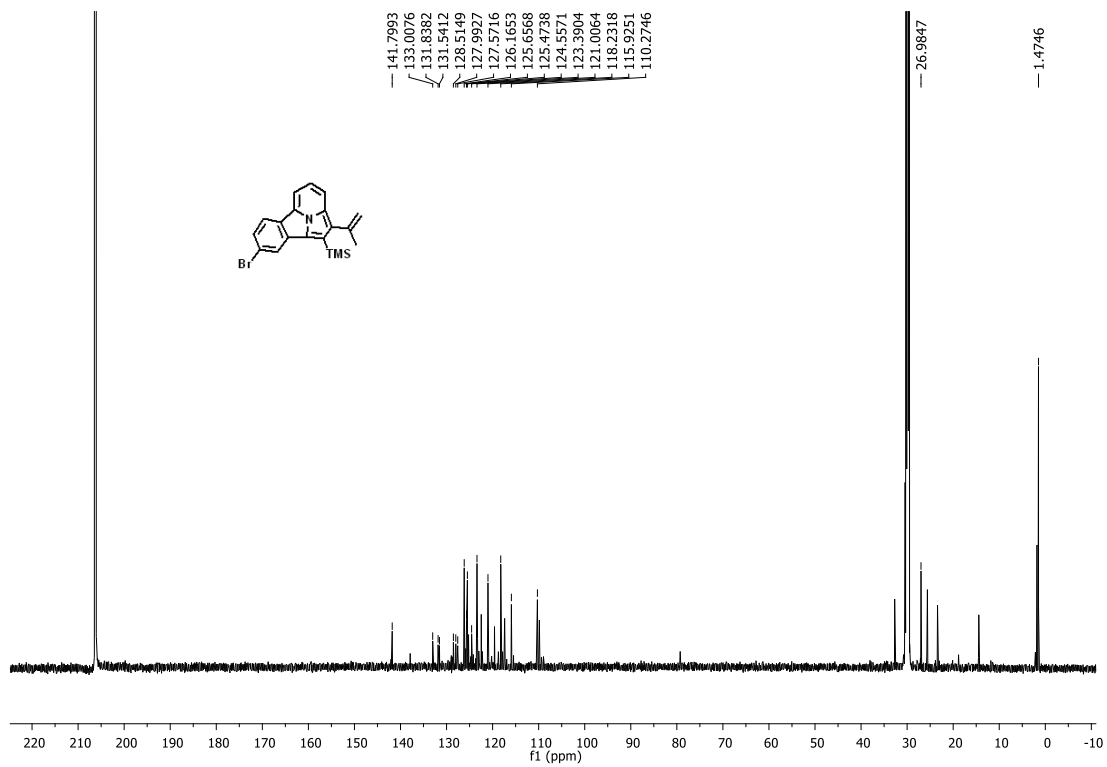

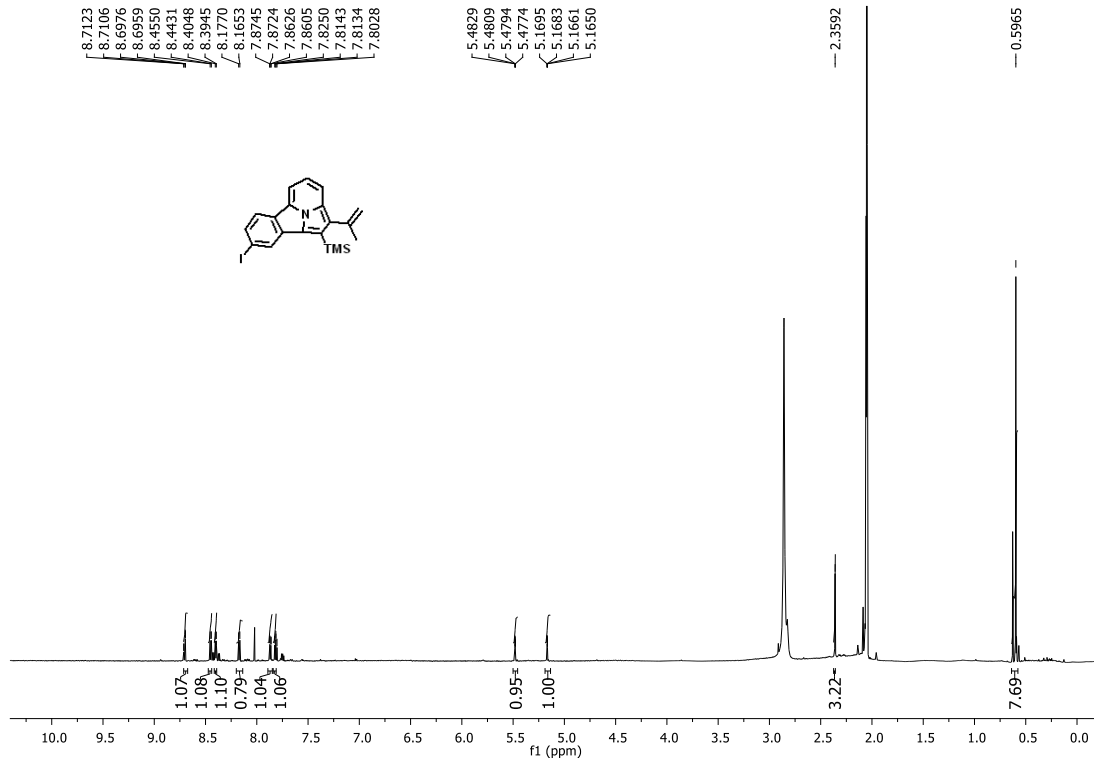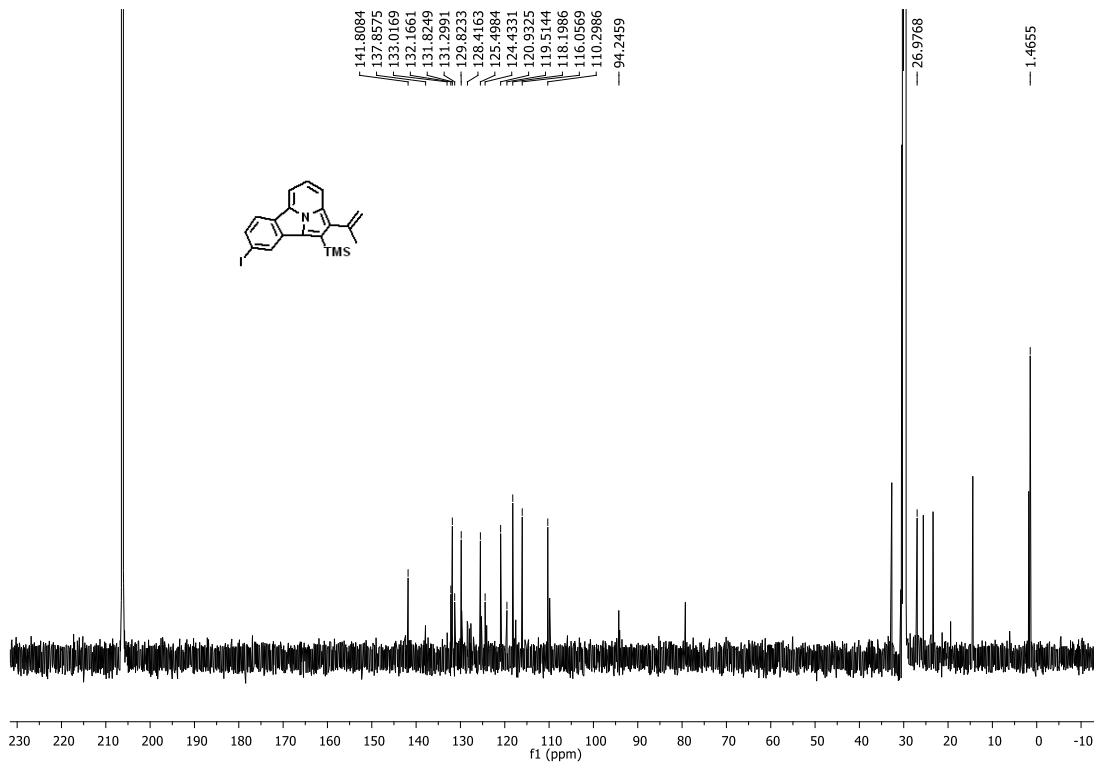

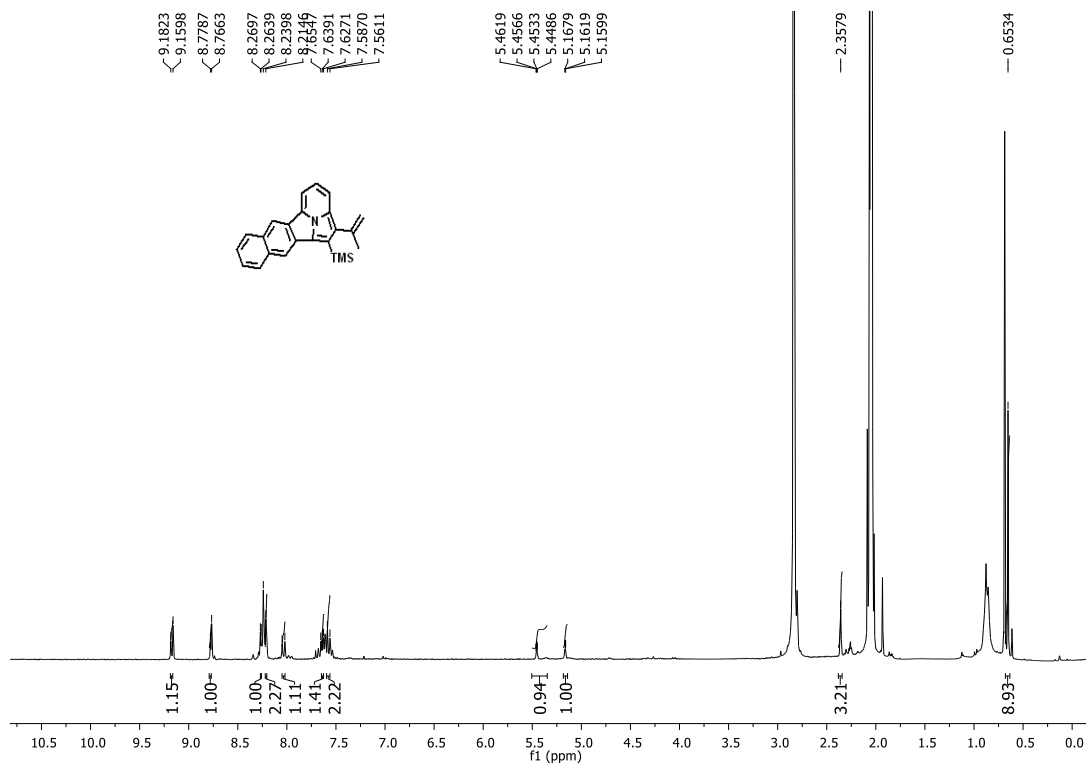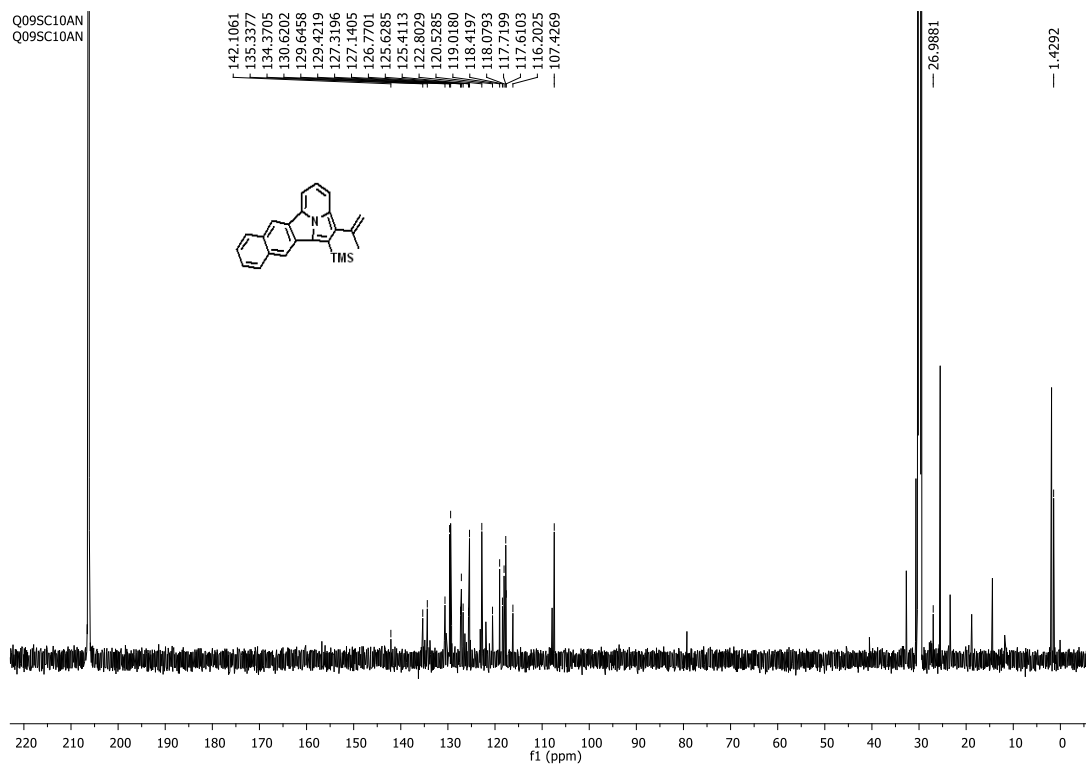

Supplement: d1ob02246f2.pdf [file d1ob02246f2.pdf]
